# Supplementary material for: Effects of sulfamethoxazole and copper on the natural microbial community from a fertilized soil
Source: PubMed Central journal article supplement — Appl Microbiol Biotechnol. 2024 Nov 14;108(1):516. doi: 10.1007/s00253-024-13324-x (PMC11564247; doi:10.1007/s00253-024-13324-x), 2024-11-14
Supplement: 253_2024_13324_MOESM1_ESM.pdf [file 253_2024_13324_MOESM1_ESM.pdf]

# Effects of sulfamethoxazole and copper on the natural microbial community from a fertilized soil

Alessandra Narciso<sup>1,2</sup>, Paola Grenni<sup>1,3</sup>, Francesca Spataro<sup>3,4\*</sup>, Chiara De Carolis<sup>1,5,6</sup>, Jasmin Rauseo<sup>3,4</sup>, Luisa Patrolecco<sup>3,4</sup>, Gian Luigi Garbini<sup>1</sup>, Ludovica Rolando<sup>1</sup>, Maria Adelaide Iannelli<sup>3</sup>, Maria de los Angeles Bustamante<sup>7</sup>, Cristina Alvarez-Alonso<sup>7</sup>, Anna Barra Caracciolo<sup>1</sup>

<sup>1</sup> Water Research Institute, National Research Council (IRSA-CNR), Montelibretti, 00010 Rome, Italy

<sup>2</sup> Department of Ecological and Biological Sciences, Tuscia University, 01100 Viterbo, Italy

<sup>3</sup> National Biodiversity Future Center (NBFC), Palermo, Italy

<sup>4</sup> Institute of Polar Sciences - National Research Council (ISP-CNR), Montelibretti 00010 Rome, Italy

<sup>5</sup> Department of Environmental Biology, Sapienza University of Rome, 00185, Rome, Italy

<sup>6</sup> Institute of Agricultural Biology and Biotechnology, National Research Council (IBBA-CNR), Montelibretti, 00010 Rome, Italy

<sup>7</sup> Centro de Investigación e Innovación Agroalimentaria y Agroambiental (CIAGRO-UMH), Miguel Hernandez University, 03312 Orihuela (Alicante), Spain.

\*Correspondence: [francesca.spataro@cnr.it](mailto:francesca.spataro@cnr.it)

## Supplementary information (SI)

### DNA extraction

The extraction of total prokaryotic DNA (0.25 g per replicate) from soil was performed using the DNeasy PowerSoil kit (Qiagen, Germantown Road Germantown, MD, USA) following the manufacturer's recommendations. The negative control (DNA-free water) was included during the entire workflow. The quantity and quality (280/260 and 260/230 absorbance ratio) of the DNA extracted were assessed with a spectrophotometry (Multiskan Sky Microplate Spectrophotometer, Thermo Fisher Scientific, MA, USA). After extraction, the DNA was stored at -20°C until use.

### Quantification of antibiotic resistance genes, mobile genetic elements and bacterial 16S rRNA gene by qPCR analysis

The targeted qPCR assays used in this study were based on previously published methods (Barra Caracciolo et al., 2022; Visca et al., 2022), with some modifications. The genes investigated were sulfamethoxazole-resistance genes (*sul1* and *sul2*) and the class 1 integron-integrase gene (*intI1*). Moreover, the 16S rRNA gene copy numbers were determined to calculate the relative abundance of the resistance genes targeted in all samples collected. All qPCR assays were performed with the CFX96 real time PCR detection System (Bio-Rad, USA) using SYBR Green detection. For each reaction, a total volume of 20 µL containing 10 µL SsoAdvanced Universal SYBR Green Supermix (Bio-Rad, USA), 0.5 µL of each primer (10 µM) and 15 ng of DNA template was used. The thermal cycling conditions were as follows: 94°C for 3 min, 45 cycles at 94°C for 15 s, annealing temperature ( $T_m$ ) specific for each gene and primer pair for 30 s. The fluorescence signal was read after each elongation step. At the end of each reaction, a melting curve starting at 55°C and increasing by 0.5°C up to 95°C was performed to verify amplicon specificity. Each assay was run in triplicate including the No Template Controls (NTC). To determine the presence of any possible qPCR inhibition, an inhibition test using samples diluted from 10 to 100-fold was conducted. The primer sequences are reported in Table S1.

### Evaluation of microbial community composition by Next-Generation Sequence

Aliquots of the DNA extracted from three replicates for each condition were used for NGS. The V3-V4 region of 16S rRNA genes were amplified by Miseq Illumina with the Pro341F and Pro805R primers reported in Table S1. These primers were selected to ensure the simultaneous identification of *Bacteria* and *Archaea* (Takahashi et al., 2014). The raw sequences were imported and demultiplexed using QIIME2 next-generation microbiome bioinformatics platform v2019.11 (Bolyen et al., 2019) and denoised with the DADA2 plug-in described by Bokulich et al., (2018). The primers were removed using the “trim-left-f” (forward) and “trim-left-r” (reverse) functions of DADA2 (Mazzurco Miritana et al., 2020). These functions remove sequences from the beginning to a given location in the amplicon. The forward primers were 17 nucleotides long and the reverse primers were 21 nucleotides long. The amplicon sequencing variants (ASV) obtained were sorted using the Silva 132 database (<https://www.arb-silva.de>) with a naive Bayes classifier trained on the amplified regions with 80% confidence (Bokulich et al., 2018). The Evenness, Shannon and Chao1 indexes were estimated by QIIME2 in order to evaluate diversity of the prokaryotic community in the different conditions.

## Supplementary tables and figures

**Table S1** Primer names and sequences of antibiotic resistance genes, mobile genetic elements and bacterial 16S rRNA gene.

| Primer name | Target gene | Primer sequence (5'→3') | Reference |
|-------------|-------------|-------------------------|-----------|
|-------------|-------------|-------------------------|-----------|

|                 |          |                              |     |
|-----------------|----------|------------------------------|-----|
| <b>Sul1 fw</b>  | sul1     | CGCACCGGAAACATCGCTGCAC       | [1] |
| <b>Sul1 rv</b>  |          | TGAAGTCCCGCCGAAGGCTCG        |     |
| <b>Sul2 fw</b>  | sul2     | GCGCTCAAGGCAGATGGCATT        | [2] |
| <b>Sul2 rv</b>  |          | GCGTTTGATACCGGCACCCGT        |     |
| <b>IntI1 fw</b> | intI1    | TCGTGCGTCGCCATACA            | [3] |
| <b>IntI1 rv</b> |          | GCTTGTTCTACGGCCGTTTGA        |     |
| <b>16S fw</b>   | 16S rRNA | CGGTGAATACGTTTCYCGG          | [4] |
| <b>16S rv</b>   |          | TACCTTGTTACGACTT             |     |
| <b>341F</b>     | 16S rRNA | CCTACGGGAGGCAGCAG            | [5] |
| <b>805RV</b>    |          | <i>GACTACHVGGGTATCTAATCC</i> |     |

[1] Vila-Costa M, Gioia R, Aceña J, et al (2017). Degradation of sulfonamides as a microbial resistance mechanism, Water Research 115, 309-317. <https://doi.org/10.1016/j.watres.2017.03.007>

[2] Kern MB, Klemmensen T, Espersen F (2002). Susceptibility of Danish *Escherichia coli* strains isolated from urinary tract infections and bacteraemia and distribution of sul genes conferring sulphonamide resistance 513-516. <https://doi.org/10.1093/jac/45.4.513>

[3] Byrne-Bailey KG, Gaze WH, Zhang L, et al (2011). Integron prevalence and diversity in manured soil, Applied and Environmental Microbiology 77, 684-687. <https://doi.org/10.1128/AEM.01425-10>

[4] McKinney CW, Dungan RS, Moore A, Leytem AB (2018). Occurrence and abundance of antibiotic resistance genes in agricultural soil receiving dairy manure (2018) 1-10. <https://doi.org/10.1093/femsec/fiy010>

[5] Baker GC, Smith JJ, Cowan DA (2003). Review and re-analysis of domain-specific 16S primers, Journal of Microbiological Methods 55, 541-555. <https://doi.org/10.1016/j.mimet.2003.08.009>

**Table S2** Soil experimental condition characterization in terms of pH, OC %, C<sub>H</sub> % and N%

| Condition         | pH       |          |          | OC (%)<br>C <sub>H</sub> (%) |                | N (%)          |           |           |           |
|-------------------|----------|----------|----------|------------------------------|----------------|----------------|-----------|-----------|-----------|
|                   | 3h       | 36d      |          | 3 h                          | 36 d           |                | 3h        | 36 d      |           |
|                   |          | Soil     | Rhizo    |                              | Soil           | Rhizo          |           | Soil      | Rhizo     |
| <b>S</b>          | 6.8±0.03 | 6.8±0.05 | 6.9±0.05 | 1.05±0.05<br>0.03±0.00       | 0.93±0.00<br>- | 1.05±0.00<br>- | 0.33±0.00 | 0.1±0.00  | 0.1±0.00  |
| <b>SC</b>         | 6.6±0.03 | 6.8±0.02 | 6.8±0.03 | 1.05±0.05<br>0.03±0.00       | -              | -              | 0.3±0.00  | -         | -         |
| <b>SCA</b>        | 6.6±0.03 | 6.8±0.03 | 6.9±0.03 | 1.00±0.00<br>0.02±0.00       | -              | -              | 0.29±0.00 | -         | -         |
| <b>Average S</b>  | 6.7±0.00 | 6.8±0.02 | 6.9±0.02 | 1.03±0.00<br>0.03±0.00       | 0.93±0.00      | 1.05±0.00      | 0.3±0.00  | 0.1±0.00  | 0.1±0.00  |
| <b>SM</b>         | 6.7±0.12 | 6.8±0.12 | 6.8±0.12 | 0.94±0.02<br>0.02±0.00       | 1.04±0.00<br>- | 1.1±0.00<br>-  | 0.3±0.00  | 0.1±0.00  | 0.1±0.00  |
| <b>SCM</b>        | 6.8±0.11 | 6.7±0.11 | 6.8±0.11 | 1.1±0.00<br>0.03±0.00        | -              | -              | 0.3±0.00  | -         | -         |
| <b>SMCA</b>       | 6.7±0.01 | 6.5±0.01 | 6.7±0.01 | 1.13±0.03<br>0.03±0.00       | -              | -              | 0.31±0.00 | -         | -         |
| <b>Average SM</b> | 6.8±0.09 | 6.7±0.08 | 6.8±0.08 | 1.06±0.02<br>0.03±0.00       | 1.04±0.00      | 1.1±0.00       | 0.3±0.00  | 0.1±0.00  | 0.1±0.00  |
| <b>SD</b>         | 6.7±0.01 | 7.1±0.02 | 6.7±0.02 | 1.1±0.00<br>0.03±0.00        | 1.26±0.03<br>- | 1.15±0.00<br>- | 0.3±0.00  | 0.36±0.00 | 0.29±0.00 |
| <b>SCD</b>        | 6.8±0.02 | 7.4±0.02 | 6.9±0.02 | 1.2±0.00<br>0.03±0.00        | -              | -              | 0.3±0.00  | -         | -         |
| <b>SDCA</b>       | 6.8±0.01 | 7.0±0.02 | 6.7±0.02 | 0.97±0.01<br>0.03±0.00       | -              | -              | 0.3±0.00  | -         | -         |
| <b>Average SD</b> | 6.8±0.01 | 7.2±0.01 | 6.8±0.01 | 1.09±0.02<br>0.03±0.00       | 1.26±0.03      | 1.15±0.00      | 0.3±0.00  | 0.36±0.00 | 0.29±0.00 |

Antibiotic or copper addition did not influence OC and N contents in the various soil conditions, consequently their values are reported as average values considering amended (SM, SCM, SMCA, and SD, SCD and SDCA) and un-amended soil (S, SC and SCA), (Table S2). Differently, with organic amendments, OC and N were introduced in the soil and this effect was particularly evident in the digestate-amended soil (without plants).

**Table S3** Results of the PostHoc tests (Tukey test) of the ANOVA test considering live microbial abundances and experimental conditions.

| PostHoc tests (wilcox test,<br>method=BH) | diff       | lwr          | upr         | p adj     |
|-------------------------------------------|------------|--------------|-------------|-----------|
| S_3h-S_36d                                | 332849.2   | -27513235.17 | 28178933.57 | 1         |
| S_P_36d-S_36d                             | 20172575   | -7673509.17  | 48018659.57 | 0.4932587 |
| SC_36d-S_36d                              | 6820577.2  | -21025507.17 | 34666661.57 | 0.9999996 |
| SC_3h-S_36d                               | 1672795.5  | -26173288.84 | 29518879.9  | 1         |
| SC_P_36d-S_36d                            | 3826133.5  | -24019950.84 | 31672217.9  | 1         |
| SCA_36d-S_36d                             | 9470962.9  | -18375121.5  | 37317047.24 | 0.9998228 |
| SCA_3h-S_36d                              | -1786608.8 | -29632693.17 | 26059475.57 | 1         |
| SCA_P_36d-S_36d                           | 20121999   | -7724084.91  | 47968083.83 | 0.4982566 |
| SCD_36d-S_36d                             | -9238170.1 | -37084254.5  | 18607914.24 | 0.9998839 |
| SCD_3h-S_36d                              | 12030013   | -15816071.17 | 39876097.57 | 0.9935787 |
| SCD_P_36d-S_36d                           | -7756012.5 | -35602096.84 | 20090071.9  | 0.9999952 |
| SCM_36d-S_36d                             | -208641.47 | -28054725.84 | 27637442.9  | 1         |
| SCM_3h-S_36d                              | 4720259.9  | -23125824.5  | 32566344.24 | 1         |
| SCM_P_36d-S_36d                           | 23526949   | -4319135.84  | 51373032.9  | 0.2150032 |
| SD_36d-S_36d                              | 28153536   | 307451.5     | 55999620.24 | 0.0444775 |
| SD_3h-S_36d                               | 13590447   | -14255637.84 | 41436530.9  | 0.97219   |
| SD_P_36d-S_36d                            | 23668060   | -4178024.17  | 51514144.57 | 0.2062864 |
| SDCA_36d-S_36d                            | 24223774   | -3622310.17  | 52069858.57 | 0.1744636 |
| SDCA_3h-S_36d                             | -3672487.1 | -31518571.5  | 24173597.24 | 1         |
| SDCA_P_36d-S_36d                          | 26069801   | -1776283.84  | 53915884.9  | 0.0952555 |
| SM_36d-S_36d                              | 4635880.5  | -23210203.84 | 32481964.9  | 1         |
| SM_3h-S_36d                               | 3582541.2  | -24263543.17 | 31428625.57 | 1         |
| SM_P_36d-S_36d                            | 23659652   | -4186432.84  | 51505735.9  | 0.2067985 |
| SMCA_36d-S_36d                            | 8595679.5  | -19250404.84 | 36441763.9  | 0.9999674 |
| SMCA_3h-S_36d                             | 3001866.2  | -24844218.17 | 30847950.57 | 1         |
| SMCA_P_36d-S_36d                          | 37808301   | 9962216.5    | 65654385.24 | 0.0006341 |
| S_P_36d-S_3h                              | 19839726   | -8006358.37  | 47685810.37 | 0.5263476 |
| SC_36d-S_3h                               | 6487728    | -21358356.37 | 34333812.37 | 0.9999999 |
| SC_3h-S_3h                                | 1339946.3  | -26506138.04 | 29186030.7  | 1         |
| SC_P_36d-S_3h                             | 3493284.3  | -24352800.04 | 31339368.7  | 1         |
| SCA_36d-S_3h                              | 9138113.7  | -18707970.7  | 36984198.04 | 0.9999037 |
| SCA_3h-S_3h                               | -2119458   | -29965542.37 | 25726626.37 | 1         |
| SCA_P_36d-S_3h                            | 19789150   | -8056934.11  | 47635234.63 | 0.5314095 |
| SCD_36d-S_3h                              | -9571019.3 | -37417103.7  | 18275065.04 | 0.9997887 |
| SCD_3h-S_3h                               | 11697164   | -16148920.37 | 39543248.37 | 0.9955812 |
| SCD_P_36d-S_3h                            | -8088861.7 | -35934946.04 | 19757222.7  | 0.9999894 |
| SCM_36d-S_3h                              | -541490.67 | -28387575.04 | 27304593.7  | 1         |
| SCM_3h-S_3h                               | 4387410.7  | -23458673.7  | 32233495.04 | 1         |
| SCM_P_36d-S_3h                            | 23194099   | -4651985.04  | 51040183.7  | 0.2365986 |
| SD_36d-S_3h                               | 27820687   | -25397.7     | 55666771.04 | 0.0504823 |
| SD_3h-S_3h                                | 13257597   | -14588487.04 | 41103681.7  | 0.9789111 |
| SD_P_36d-S_3h                             | 23335211   | -4510873.37  | 51181295.37 | 0.2272654 |
| SDCA_36d-S_3h                             | 23890925   | -3955159.37  | 51737009.37 | 0.1930474 |
| SDCA_3h-S_3h                              | -4005336.3 | -31851420.7  | 23840748.04 | 1         |
| SDCA_P_36d-S_3h                           | 25736951   | -2109133.04  | 53583035.7  | 0.10679   |
| SM_36d-S_3h                               | 4303031.3  | -23543053.04 | 32149115.7  | 1         |
| SM_3h-S_3h                                | 3249692    | -24596392.37 | 31095776.37 | 1         |

|                    |            |              |             |           |
|--------------------|------------|--------------|-------------|-----------|
| SM_P_36d-S_3h      | 23326802   | -4519282.04  | 51172886.7  | 0.2278143 |
| SMCA_36d-S_3h      | 8262830.3  | -19583254.04 | 36108914.7  | 0.9999842 |
| SMCA_3h-S_3h       | 2669017    | -25177067.37 | 30515101.37 | 1         |
| SMCA_P_36d-S_3h    | 37475452   | 9629367.3    | 65321536.04 | 0.0007441 |
| SC_36d-S_P_36d     | -13351998  | -41198082.37 | 14494086.37 | 0.977148  |
| SC_3h-S_P_36d      | -18499780  | -46345864.04 | 9346304.7   | 0.6604158 |
| SC_P_36d-S_P_36d   | -16346442  | -44192526.04 | 11499642.7  | 0.8467807 |
| SCA_36d-S_P_36d    | -10701612  | -38547696.7  | 17144472.04 | 0.9987601 |
| SCA_3h-S_P_36d     | -21959184  | -49805268.37 | 5886900.37  | 0.3292865 |
| SCA_P_36d-S_P_36d  | -50575.737 | -27896660.11 | 27795508.63 | 1         |
| SCD_36d-S_P_36d    | -29410745  | -57256829.7  | -1564660.96 | 0.027147  |
| SCD_3h-S_P_36d     | -8142562   | -35988646.37 | 19703522.37 | 0.999988  |
| SCD_P_36d-S_P_36d  | -27928588  | -55774672.04 | -82503.3    | 0.0484613 |
| SCM_36d-S_P_36d    | -20381217  | -48227301.04 | 7464867.7   | 0.4727809 |
| SCM_3h-S_P_36d     | -15452315  | -43298399.7  | 12393769.04 | 0.9026367 |
| SCM_P_36d-S_P_36d  | 3354373.3  | -24491711.04 | 31200457.7  | 1         |
| SD_36d-S_P_36d     | 7980960.7  | -19865123.7  | 35827045.04 | 0.9999918 |
| SD_3h-S_P_36d      | -6582128.7 | -34428213.04 | 21263955.7  | 0.9999998 |
| SD_P_36d-S_P_36d   | 3495485    | -24350599.37 | 31341569.37 | 1         |
| SDCA_36d-S_P_36d   | 4051199    | -23794885.37 | 31897283.37 | 1         |
| SDCA_3h-S_P_36d    | -23845062  | -51691146.7  | 4001022.04  | 0.1957192 |
| SDCA_P_36d-S_P_36d | 5897225.3  | -21948859.04 | 33743309.7  | 1         |
| SM_36d-S_P_36d     | -15536695  | -43382779.04 | 12309389.7  | 0.8980083 |
| SM_3h-S_P_36d      | -16590034  | -44436118.37 | 11256050.37 | 0.8290334 |
| SM_P_36d-S_P_36d   | 3487076.3  | -24359008.04 | 31333160.7  | 1         |
| SMCA_36d-S_P_36d   | -11576896  | -39422980.04 | 16269188.7  | 0.9961623 |
| SMCA_3h-S_P_36d    | -17170709  | -45016793.37 | 10675375.37 | 0.7827606 |
| SMCA_P_36d-S_P_36d | 17635726   | -10210358.7  | 45481810.04 | 0.7421516 |
| SC_3h-SC_36d       | -5147781.7 | -32993866.04 | 22698302.7  | 1         |
| SC_P_36d-SC_36d    | -2994443.7 | -30840528.04 | 24851640.7  | 1         |
| SCA_36d-SC_36d     | 2650385.7  | -25195698.7  | 30496470.04 | 1         |
| SCA_3h-SC_36d      | -8607186   | -36453270.37 | 19238898.37 | 0.9999666 |
| SCA_P_36d-SC_36d   | 13301422   | -14544662.11 | 41147506.63 | 0.9781062 |
| SCD_36d-SC_36d     | -16058747  | -43904831.7  | 11787337.04 | 0.8663771 |
| SCD_3h-SC_36d      | 5209436    | -22636648.37 | 33055520.37 | 1         |
| SCD_P_36d-SC_36d   | -14576590  | -42422674.04 | 13269494.7  | 0.9427985 |
| SCM_36d-SC_36d     | -7029218.7 | -34875303.04 | 20816865.7  | 0.9999993 |
| SCM_3h-SC_36d      | -2100317.3 | -29946401.7  | 25745767.04 | 1         |
| SCM_P_36d-SC_36d   | 16706371   | -11139713.04 | 44552455.7  | 0.8201977 |
| SD_36d-SC_36d      | 21332959   | -6513125.7   | 49179043.04 | 0.3833535 |
| SD_3h-SC_36d       | 6769869.3  | -21076215.04 | 34615953.7  | 0.9999997 |
| SD_P_36d-SC_36d    | 16847483   | -10998601.37 | 44693567.37 | 0.8091795 |
| SDCA_36d-SC_36d    | 17403197   | -10442887.37 | 45249281.37 | 0.7628145 |
| SDCA_3h-SC_36d     | -10493064  | -38339148.7  | 17353020.04 | 0.9990798 |
| SDCA_P_36d-SC_36d  | 19249223   | -8596861.04  | 47095307.7  | 0.5857061 |
| SM_36d-SC_36d      | -2184696.7 | -30030781.04 | 25661387.7  | 1         |
| SM_3h-SC_36d       | -3238036   | -31084120.37 | 24608048.37 | 1         |
| SM_P_36d-SC_36d    | 16839074   | -11007010.04 | 44685158.7  | 0.8098451 |
| SMCA_36d-SC_36d    | 1775102.3  | -26070982.04 | 29621186.7  | 1         |

|                     |            |              |             |           |
|---------------------|------------|--------------|-------------|-----------|
| SMCA_3h-SC_36d      | -3818711   | -31664795.37 | 24027373.37 | 1         |
| SMCA_P_36d-SC_36d   | 30987724   | 3141639.3    | 58833808.04 | 0.0141667 |
| SC_P_36d-SC_3h      | 2153338    | -25692746.37 | 29999422.37 | 1         |
| SCA_36d-SC_3h       | 7798167.3  | -20047917.04 | 35644251.7  | 0.9999947 |
| SCA_3h-SC_3h        | -3459404.3 | -31305488.7  | 24386680.04 | 1         |
| SCA_P_36d-SC_3h     | 18449204   | -9396880.44  | 46295288.3  | 0.6653678 |
| SCD_36d-SC_3h       | -10910966  | -38757050.04 | 16935118.7  | 0.9983468 |
| SCD_3h-SC_3h        | 10357218   | -17488866.7  | 38203302.04 | 0.9992472 |
| SCD_P_36d-SC_3h     | -9428808   | -37274892.37 | 18417276.37 | 0.9998356 |
| SCM_36d-SC_3h       | -1881437   | -29727521.37 | 25964647.37 | 1         |
| SCM_3h-SC_3h        | 3047464.3  | -24798620.04 | 30893548.7  | 1         |
| SCM_P_36d-SC_3h     | 21854153   | -5991931.37  | 49700237.37 | 0.3380462 |
| SD_36d-SC_3h        | 26480740   | -1365344.04  | 54326824.7  | 0.0824758 |
| SD_3h-SC_3h         | 11917651   | -15928433.37 | 39763735.37 | 0.9943248 |
| SD_P_36d-SC_3h      | 21995265   | -5850819.7   | 49841349.04 | 0.3263074 |
| SDCA_36d-SC_3h      | 22550979   | -5295105.7   | 50397063.04 | 0.2824389 |
| SDCA_3h-SC_3h       | -5345282.7 | -33191367.04 | 22500801.7  | 1         |
| SDCA_P_36d-SC_3h    | 24397005   | -3449079.37  | 52243089.37 | 0.1653452 |
| SM_36d-SC_3h        | 2963085    | -24882999.37 | 30809169.37 | 1         |
| SM_3h-SC_3h         | 1909745.7  | -25936338.7  | 29755830.04 | 1         |
| SM_P_36d-SC_3h      | 21986856   | -5859228.37  | 49832940.37 | 0.3270003 |
| SMCA_36d-SC_3h      | 6922884    | -20923200.37 | 34768968.37 | 0.9999995 |
| SMCA_3h-SC_3h       | 1329070.7  | -26517013.7  | 29175155.04 | 1         |
| SMCA_P_36d-SC_3h    | 36135505   | 8289420.96   | 63981589.7  | 0.0014067 |
| SCA_36d-SC_P_36d    | 5644829.3  | -22201255.04 | 33490913.7  | 1         |
| SCA_3h-SC_P_36d     | -5612742.3 | -33458826.7  | 22233342.04 | 1         |
| SCA_P_36d-SC_P_36d  | 16295866   | -11550218.44 | 44141950.3  | 0.8503343 |
| SCD_36d-SC_P_36d    | -13064304  | -40910388.04 | 14781780.7  | 0.9821914 |
| SCD_3h-SC_P_36d     | 8203879.7  | -19642204.7  | 36049964.04 | 0.9999862 |
| SCD_P_36d-SC_P_36d  | -11582146  | -39428230.37 | 16263938.37 | 0.9961384 |
| SCM_36d-SC_P_36d    | -4034775   | -31880859.37 | 23811309.37 | 1         |
| SCM_3h-SC_P_36d     | 894126.33  | -26951958.04 | 28740210.7  | 1         |
| SCM_P_36d-SC_P_36d  | 19700815   | -8145269.37  | 47546899.37 | 0.5402665 |
| SD_36d-SC_P_36d     | 24327402   | -3518682.04  | 52173486.7  | 0.168964  |
| SD_3h-SC_P_36d      | 9764313    | -18081771.37 | 37610397.37 | 0.9997059 |
| SD_P_36d-SC_P_36d   | 19841927   | -8004157.7   | 47688011.04 | 0.5261275 |
| SDCA_36d-SC_P_36d   | 20397641   | -7448443.7   | 48243725.04 | 0.4711795 |
| SDCA_3h-SC_P_36d    | -7498620.7 | -35344705.04 | 20347463.7  | 0.9999975 |
| SDCA_P_36d-SC_P_36d | 22243667   | -5602417.37  | 50089751.37 | 0.3062244 |
| SM_36d-SC_P_36d     | 809747     | -27036337.37 | 28655831.37 | 1         |
| SM_3h-SC_P_36d      | -243592.33 | -28089676.7  | 27602492.04 | 1         |
| SM_P_36d-SC_P_36d   | 19833518   | -8012566.37  | 47679602.37 | 0.5269685 |
| SMCA_36d-SC_P_36d   | 4769546    | -23076538.37 | 32615630.37 | 1         |
| SMCA_3h-SC_P_36d    | -824267.33 | -28670351.7  | 27021817.04 | 1         |
| SMCA_P_36d-SC_P_36d | 33982167   | 6136082.96   | 61828251.7  | 0.0038079 |
| SCA_3h-SCA_36d      | -11257572  | -39103656.04 | 16588512.7  | 0.997403  |
| SCA_P_36d-SCA_36d   | 10651037   | -17195047.78 | 38497120.97 | 0.9988453 |
| SCD_36d-SCA_36d     | -18709133  | -46555217.37 | 9136951.37  | 0.6397625 |
| SCD_3h-SCA_36d      | 2559050.3  | -25287034.04 | 30405134.7  | 1         |

|                      |            |              |             |           |
|----------------------|------------|--------------|-------------|-----------|
| SCD_P_36d-SCA_36d    | -17226975  | -45073059.7  | 10619109.04 | 0.7780025 |
| SCM_36d-SCA_36d      | -9679604.3 | -37525688.7  | 18166480.04 | 0.9997452 |
| SCM_3h-SCA_36d       | -4750703   | -32596787.37 | 23095381.37 | 1         |
| SCM_P_36d-SCA_36d    | 14055986   | -13790098.7  | 41902070.04 | 0.9602209 |
| SD_36d-SCA_36d       | 18682573   | -9163511.37  | 46528657.37 | 0.6423953 |
| SD_3h-SCA_36d        | 4119483.7  | -23726600.7  | 31965568.04 | 1         |
| SD_P_36d-SCA_36d     | 14197097   | -13648987.04 | 42043181.7  | 0.9559412 |
| SDCA_36d-SCA_36d     | 14752811   | -13093273.04 | 42598895.7  | 0.9358476 |
| SDCA_3h-SCA_36d      | -13143450  | -40989534.37 | 14702634.37 | 0.9809003 |
| SDCA_P_36d-SCA_36d   | 16598838   | -11247246.7  | 44444922.04 | 0.8283728 |
| SM_36d-SCA_36d       | -4835082.3 | -32681166.7  | 23011002.04 | 1         |
| SM_3h-SCA_36d        | -5888421.7 | -33734506.04 | 21957662.7  | 1         |
| SM_P_36d-SCA_36d     | 14188689   | -13657395.7  | 42034773.04 | 0.9562051 |
| SMCA_36d-SCA_36d     | -875283.33 | -28721367.7  | 26970801.04 | 1         |
| SMCA_3h-SCA_36d      | -6469096.7 | -34315181.04 | 21376987.7  | 0.9999999 |
| SMCA_P_36d-SCA_36d   | 28337338   | 491253.63    | 56183422.37 | 0.041442  |
| SCA_P_36d-SCA_3h     | 21908608   | -5937476.11  | 49754692.63 | 0.3334884 |
| SCD_36d-SCA_3h       | -7451561.3 | -35297645.7  | 20394523.04 | 0.9999978 |
| SCD_3h-SCA_3h        | 13816622   | -14029462.37 | 41662706.37 | 0.9667724 |
| SCD_P_36d-SCA_3h     | -5969403.7 | -33815488.04 | 21876680.7  | 1         |
| SCM_36d-SCA_3h       | 1577967.3  | -26268117.04 | 29424051.7  | 1         |
| SCM_3h-SCA_3h        | 6506868.7  | -21339215.7  | 34352953.04 | 0.9999999 |
| SCM_P_36d-SCA_3h     | 25313557   | -2532527.04  | 53159641.7  | 0.1231088 |
| SD_36d-SCA_3h        | 29940145   | 2094060.3    | 57786229.04 | 0.0219018 |
| SD_3h-SCA_3h         | 15377055   | -12469029.04 | 43223139.7  | 0.9066509 |
| SD_P_36d-SCA_3h      | 25454669   | -2391415.37  | 53300753.37 | 0.1174577 |
| SDCA_36d-SCA_3h      | 26010383   | -1835701.37  | 53856467.37 | 0.0972345 |
| SDCA_3h-SCA_3h       | -1885878.3 | -29731962.7  | 25960206.04 | 1         |
| SDCA_P_36d-SCA_3h    | 27856409   | 10324.96     | 55702493.7  | 0.0498051 |
| SM_36d-SCA_3h        | 6422489.3  | -21423595.04 | 34268573.7  | 0.9999999 |
| SM_3h-SCA_3h         | 5369150    | -22476934.37 | 33215234.37 | 1         |
| SM_P_36d-SCA_3h      | 25446260   | -2399824.04  | 53292344.7  | 0.1177884 |
| SMCA_36d-SCA_3h      | 10382288   | -17463796.04 | 38228372.7  | 0.9992185 |
| SMCA_3h-SCA_3h       | 4788475    | -23057609.37 | 32634559.37 | 1         |
| SMCA_P_36d-SCA_3h    | 39594910   | 11748825.3   | 67440994.04 | 0.0002658 |
| SCD_36d-SCA_P_36d    | -29360170  | -57206253.97 | -1514085.22 | 0.0277039 |
| SCD_3h-SCA_P_36d     | -8091986.3 | -35938070.63 | 19754098.11 | 0.9999893 |
| SCD_P_36d-SCA_P_36d  | -27878012  | -55724096.3  | -31927.56   | 0.0493995 |
| SCM_36d-SCA_P_36d    | -20330641  | -48176725.3  | 7515443.44  | 0.4777225 |
| SCM_3h-SCA_P_36d     | -15401740  | -43247823.97 | 12444344.78 | 0.9053461 |
| SCM_P_36d-SCA_P_36d  | 3404949.1  | -24441135.3  | 31251033.44 | 1         |
| SD_36d-SCA_P_36d     | 8031536.4  | -19814547.97 | 35877620.78 | 0.9999907 |
| SD_3h-SCA_P_36d      | -6531552.9 | -34377637.3  | 21314531.44 | 0.9999999 |
| SD_P_36d-SCA_P_36d   | 3546060.7  | -24300023.63 | 31392145.11 | 1         |
| SDCA_36d-SCA_P_36d   | 4101774.7  | -23744309.63 | 31947859.11 | 1         |
| SDCA_3h-SCA_P_36d    | -23794487  | -51640570.97 | 4051597.78  | 0.1986972 |
| SDCA_P_36d-SCA_P_36d | 5947801.1  | -21898283.3  | 33793885.44 | 1         |
| SM_36d-SCA_P_36d     | -15486119  | -43332203.3  | 12359965.44 | 0.9007988 |
| SM_3h-SCA_P_36d      | -16539458  | -44385542.63 | 11306626.11 | 0.832803  |

|                      |            |              |             |           |
|----------------------|------------|--------------|-------------|-----------|
| SM_P_36d-SCA_P_36d   | 3537652.1  | -24308432.3  | 31383736.44 | 1         |
| SMCA_36d-SCA_P_36d   | -11526320  | -39372404.3  | 16319764.44 | 0.9963868 |
| SMCA_3h-SCA_P_36d    | -17120133  | -44966217.63 | 10725951.11 | 0.7869985 |
| SMCA_P_36d-SCA_P_36d | 17686301   | -10159782.97 | 45532385.78 | 0.7375701 |
| SCD_3h-SCD_36d       | 21268183   | -6577901.04  | 49114267.7  | 0.3891859 |
| SCD_P_36d-SCD_36d    | 1482157.7  | -26363926.7  | 29328242.04 | 1         |
| SCM_36d-SCD_36d      | 9029528.7  | -18816555.7  | 36875613.04 | 0.9999218 |
| SCM_3h-SCD_36d       | 13958430   | -13887654.37 | 41804514.37 | 0.9629963 |
| SCM_P_36d-SCD_36d    | 32765119   | 4919034.3    | 60611203.04 | 0.0065678 |
| SD_36d-SCD_36d       | 37391706   | 9545621.63   | 65237790.37 | 0.0007745 |
| SD_3h-SCD_36d        | 22828617   | -5017467.7   | 50674701.04 | 0.261988  |
| SD_P_36d-SCD_36d     | 32906230   | 5060145.96   | 60752314.7  | 0.00617   |
| SDCA_36d-SCD_36d     | 33461944   | 5615859.96   | 61308028.7  | 0.0048152 |
| SDCA_3h-SCD_36d      | 5565683    | -22280401.37 | 33411767.37 | 1         |
| SDCA_P_36d-SCD_36d   | 35307971   | 7461886.3    | 63154055.04 | 0.0020715 |
| SM_36d-SCD_36d       | 13874051   | -13972033.7  | 41720135.04 | 0.9652794 |
| SM_3h-SCD_36d        | 12820711   | -15025373.04 | 40666795.7  | 0.9857408 |
| SM_P_36d-SCD_36d     | 32897822   | 5051737.3    | 60743906.04 | 0.0061931 |
| SMCA_36d-SCD_36d     | 17833850   | -10012234.7  | 45679934.04 | 0.7240389 |
| SMCA_3h-SCD_36d      | 12240036   | -15606048.04 | 40086120.7  | 0.9919677 |
| SMCA_P_36d-SCD_36d   | 47046471   | 19200386.63  | 74892555.37 | 0.0000062 |
| SCD_P_36d-SCD_3h     | -19786026  | -47632110.04 | 8060058.7   | 0.5317225 |
| SCM_36d-SCD_3h       | -12238655  | -40084739.04 | 15607429.7  | 0.9919792 |
| SCM_3h-SCD_3h        | -7309753.3 | -35155837.7  | 20536331.04 | 0.9999985 |
| SCM_P_36d-SCD_3h     | 11496935   | -16349149.04 | 39343019.7  | 0.9965121 |
| SD_36d-SCD_3h        | 16123523   | -11722561.7  | 43969607.04 | 0.8620967 |
| SD_3h-SCD_3h         | 1560433.3  | -26285651.04 | 29406517.7  | 1         |
| SD_P_36d-SCD_3h      | 11638047   | -16208037.37 | 39484131.37 | 0.9958754 |
| SDCA_36d-SCD_3h      | 12193761   | -15652323.37 | 40039845.37 | 0.9923483 |
| SDCA_3h-SCD_3h       | -15702500  | -43548584.7  | 12143584.04 | 0.8885195 |
| SDCA_P_36d-SCD_3h    | 14039787   | -13806297.04 | 41885871.7  | 0.9606919 |
| SM_36d-SCD_3h        | -7394132.7 | -35240217.04 | 20451951.7  | 0.9999981 |
| SM_3h-SCD_3h         | -8447472   | -36293556.37 | 19398612.37 | 0.9999763 |
| SM_P_36d-SCD_3h      | 11629638   | -16216446.04 | 39475722.7  | 0.9959159 |
| SMCA_36d-SCD_3h      | -3434333.7 | -31280418.04 | 24411750.7  | 1         |
| SMCA_3h-SCD_3h       | -9028147   | -36874231.37 | 18817937.37 | 0.999922  |
| SMCA_P_36d-SCD_3h    | 25778288   | -2067796.7   | 53624372.04 | 0.1052973 |
| SCM_36d-SCD_P_36d    | 7547371    | -20298713.37 | 35393455.37 | 0.9999972 |
| SCM_3h-SCD_P_36d     | 12476272   | -15369812.04 | 40322356.7  | 0.9897761 |
| SCM_P_36d-SCD_P_36d  | 31282961   | 3436876.63   | 59129045.37 | 0.0124992 |
| SD_36d-SCD_P_36d     | 35909548   | 8063463.96   | 63755632.7  | 0.0015643 |
| SD_3h-SCD_P_36d      | 21346459   | -6499625.37  | 49192543.37 | 0.3821432 |
| SD_P_36d-SCD_P_36d   | 31424073   | 3577988.3    | 59270157.04 | 0.0117687 |
| SDCA_36d-SCD_P_36d   | 31979787   | 4133702.3    | 59825871.04 | 0.0092637 |
| SDCA_3h-SCD_P_36d    | 4083525.3  | -23762559.04 | 31929609.7  | 1         |
| SDCA_P_36d-SCD_P_36d | 33825813   | 5979728.63   | 61671897.37 | 0.0040873 |
| SM_36d-SCD_P_36d     | 12391893   | -15454191.37 | 40237977.37 | 0.9906084 |
| SM_3h-SCD_P_36d      | 11338554   | -16507530.7  | 39184638.04 | 0.9971261 |
| SM_P_36d-SCD_P_36d   | 31415664   | 3569579.63   | 59261748.37 | 0.0118111 |

|                      |            |              |             |           |
|----------------------|------------|--------------|-------------|-----------|
| SMCA_36d-SCD_P_36d   | 16351692   | -11494392.37 | 44197776.37 | 0.8464091 |
| SMCA_3h-SCD_P_36d    | 10757879   | -17088205.7  | 38603963.04 | 0.9986589 |
| SMCA_P_36d-SCD_P_36d | 45564313   | 17718228.96  | 73410397.7  | 0.0000132 |
| SCM_3h-SCM_36d       | 4928901.3  | -22917183.04 | 32774985.7  | 1         |
| SCM_P_36d-SCM_36d    | 23735590   | -4110494.37  | 51581674.37 | 0.2022068 |
| SD_36d-SCM_36d       | 28362177   | 516092.96    | 56208261.7  | 0.0410463 |
| SD_3h-SCM_36d        | 13799088   | -14046996.37 | 41645172.37 | 0.9672185 |
| SD_P_36d-SCM_36d     | 23876702   | -3969382.7   | 51722786.04 | 0.1938731 |
| SDCA_36d-SCM_36d     | 24432416   | -3413668.7   | 52278500.04 | 0.1635272 |
| SDCA_3h-SCM_36d      | -3463845.7 | -31309930.04 | 24382238.7  | 1         |
| SDCA_P_36d-SCM_36d   | 26278442   | -1567642.37  | 54124526.37 | 0.0885725 |
| SM_36d-SCM_36d       | 4844522    | -23001562.37 | 32690606.37 | 1         |
| SM_3h-SCM_36d        | 3791182.7  | -24054901.7  | 31637267.04 | 1         |
| SM_P_36d-SCM_36d     | 23868293   | -3977791.37  | 51714377.37 | 0.1943625 |
| SMCA_36d-SCM_36d     | 8804321    | -19041763.37 | 36650405.37 | 0.9999499 |
| SMCA_3h-SCM_36d      | 3210507.7  | -24635576.7  | 31056592.04 | 1         |
| SMCA_P_36d-SCM_36d   | 38016942   | 10170857.96  | 65863026.7  | 0.0005734 |
| SCM_P_36d-SCM_3h     | 18806689   | -9039395.7   | 46652773.04 | 0.6300657 |
| SD_36d-SCM_3h        | 23433276   | -4412808.37  | 51279360.37 | 0.2209336 |
| SD_3h-SCM_3h         | 8870186.7  | -18975897.7  | 36716271.04 | 0.9999428 |
| SD_P_36d-SCM_3h      | 18947800   | -8898284.04  | 46793884.7  | 0.6159751 |
| SDCA_36d-SCM_3h      | 19503514   | -8342570.04  | 47349598.7  | 0.5601014 |
| SDCA_3h-SCM_3h       | -8392747   | -36238831.37 | 19453337.37 | 0.9999789 |
| SDCA_P_36d-SCM_3h    | 21349541   | -6496543.7   | 49195625.04 | 0.3818672 |
| SM_36d-SCM_3h        | -84379.333 | -27930463.7  | 27761705.04 | 1         |
| SM_3h-SCM_3h         | -1137718.7 | -28983803.04 | 26708365.7  | 1         |
| SM_P_36d-SCM_3h      | 18939392   | -8906692.7   | 46785476.04 | 0.6168166 |
| SMCA_36d-SCM_3h      | 3875419.7  | -23970664.7  | 31721504.04 | 1         |
| SMCA_3h-SCM_3h       | -1718393.7 | -29564478.04 | 26127690.7  | 1         |
| SMCA_P_36d-SCM_3h    | 33088041   | 5241956.63   | 60934125.37 | 0.0056912 |
| SD_36d-SCM_P_36d     | 4626587.3  | -23219497.04 | 32472671.7  | 1         |
| SD_3h-SCM_P_36d      | -9936502   | -37782586.37 | 17909582.37 | 0.9996093 |
| SD_P_36d-SCM_P_36d   | 141111.67  | -27704972.7  | 27987196.04 | 1         |
| SDCA_36d-SCM_P_36d   | 696825.67  | -27149258.7  | 28542910.04 | 1         |
| SDCA_3h-SCM_P_36d    | -27199436  | -55045520.04 | 646648.7    | 0.063631  |
| SDCA_P_36d-SCM_P_36d | 2542852    | -25303232.37 | 30388936.37 | 1         |
| SM_36d-SCM_P_36d     | -18891068  | -46737152.37 | 8955016.37  | 0.6216482 |
| SM_3h-SCM_P_36d      | -19944407  | -47790491.7  | 7901677.04  | 0.5158953 |
| SM_P_36d-SCM_P_36d   | 132703     | -27713381.37 | 27978787.37 | 1         |
| SMCA_36d-SCM_P_36d   | -14931269  | -42777353.37 | 12914815.37 | 0.9282385 |
| SMCA_3h-SCM_P_36d    | -20525082  | -48371166.7  | 7321002.04  | 0.4588109 |
| SMCA_P_36d-SCM_P_36d | 14281352   | -13564732.04 | 42127436.7  | 0.9532323 |
| SD_3h-SD_36d         | -14563089  | -42409173.7  | 13282995.04 | 0.9433083 |
| SD_P_36d-SD_36d      | -4485475.7 | -32331560.04 | 23360608.7  | 1         |
| SDCA_36d-SD_36d      | -3929761.7 | -31775846.04 | 23916322.7  | 1         |
| SDCA_3h-SD_36d       | -31826023  | -59672107.37 | -3979938.63 | 0.0099014 |
| SDCA_P_36d-SD_36d    | -2083735.3 | -29929819.7  | 25762349.04 | 1         |
| SM_36d-SD_36d        | -23517655  | -51363739.7  | 4328429.04  | 0.2155864 |
| SM_3h-SD_36d         | -24570995  | -52417079.04 | 3275089.7   | 0.1565607 |



|                       |            |              |             |           |
|-----------------------|------------|--------------|-------------|-----------|
| SM_P_36d-SD_36d       | -4493884.3 | -32339968.7  | 23352200.04 | 1         |
| SMCA_36d-SD_36d       | -19557856  | -47403940.7  | 8288228.04  | 0.554633  |
| SMCA_3h-SD_36d        | -25151670  | -52997754.04 | 2694414.7   | 0.1298617 |
| SMCA_P_36d-SD_36d     | 9654765    | -18191319.37 | 37500849.37 | 0.9997558 |
| SD_P_36d-SD_3h        | 10077614   | -17768470.7  | 37923698.04 | 0.9995103 |
| SDCA_36d-SD_3h        | 10633328   | -17212756.7  | 38479412.04 | 0.998874  |
| SDCA_3h-SD_3h         | -17262934  | -45109018.04 | 10583150.7  | 0.7749381 |
| SDCA_P_36d-SD_3h      | 12479354   | -15366730.37 | 40325438.37 | 0.9897446 |
| SM_36d-SD_3h          | -8954566   | -36800650.37 | 18891518.37 | 0.9999324 |
| SM_3h-SD_3h           | -10007905  | -37853989.7  | 17838179.04 | 0.9995617 |
| SM_P_36d-SD_3h        | 10069205   | -17776879.37 | 37915289.37 | 0.9995168 |
| SMCA_36d-SD_3h        | -4994767   | -32840851.37 | 22851317.37 | 1         |
| SMCA_3h-SD_3h         | -10588580  | -38434664.7  | 17257504.04 | 0.9989436 |
| SMCA_P_36d-SD_3h      | 24217854   | -3628230.04  | 52063938.7  | 0.1747819 |
| SDCA_36d-SD_P_36d     | 555714     | -27290370.37 | 28401798.37 | 1         |
| SDCA_3h-SD_P_36d      | -27340547  | -55186631.7  | 505537.04   | 0.0604065 |
| SDCA_P_36d-SD_P_36d   | 2401740.3  | -25444344.04 | 30247824.7  | 1         |
| SM_36d-SD_P_36d       | -19032180  | -46878264.04 | 8813904.7   | 0.6075204 |
| SM_3h-SD_P_36d        | -20085519  | -47931603.37 | 7760565.37  | 0.5018691 |
| SM_P_36d-SD_P_36d     | -8408.667  | -27854493.04 | 27837675.7  | 1         |
| SMCA_36d-SD_P_36d     | -15072381  | -42918465.04 | 12773703.7  | 0.9218074 |
| SMCA_3h-SD_P_36d      | -20666194  | -48512278.37 | 7179890.37  | 0.4452443 |
| SMCA_P_36d-SD_P_36d   | 14140241   | -13705843.7  | 41986325.04 | 0.9577038 |
| SDCA_3h-SDCA_36d      | -27896261  | -55742345.7  | -50176.96   | 0.0490591 |
| SDCA_P_36d-SDCA_36d   | 1846026.3  | -26000058.04 | 29692110.7  | 1         |
| SM_36d-SDCA_36d       | -19587894  | -47433978.04 | 8258190.7   | 0.5516118 |
| SM_3h-SDCA_36d        | -20641233  | -48487317.37 | 7204851.37  | 0.4476336 |
| SM_P_36d-SDCA_36d     | -564122.67 | -28410207.04 | 27281961.7  | 1         |
| SMCA_36d-SDCA_36d     | -15628095  | -43474179.04 | 12217989.7  | 0.8928422 |
| SMCA_3h-SDCA_36d      | -21221908  | -49067992.37 | 6624176.37  | 0.3933781 |
| SMCA_P_36d-SDCA_36d   | 13584527   | -14261557.7  | 41430611.04 | 0.9723222 |
| SDCA_P_36d-SDCA_3h    | 29742288   | 1896203.3    | 57588372.04 | 0.0237423 |
| SM_36d-SDCA_3h        | 8308367.7  | -19537716.7  | 36154452.04 | 0.9999825 |
| SM_3h-SDCA_3h         | 7255028.3  | -20591056.04 | 35101112.7  | 0.9999987 |
| SM_P_36d-SDCA_3h      | 27332139   | -513945.7    | 55178223.04 | 0.0605945 |
| SMCA_36d-SDCA_3h      | 12268167   | -15577917.7  | 40114251.04 | 0.9917288 |
| SMCA_3h-SDCA_3h       | 6674353.3  | -21171731.04 | 34520437.7  | 0.9999998 |
| SMCA_P_36d-SDCA_3h    | 41480788   | 13634703.63  | 69326872.37 | 0.0001044 |
| SM_36d-SDCA_P_36d     | -21433920  | -49280004.37 | 6412164.37  | 0.374348  |
| SM_3h-SDCA_P_36d      | -22487259  | -50333343.7  | 5358825.04  | 0.2872725 |
| SM_P_36d-SDCA_P_36d   | -2410149   | -30256233.37 | 25435935.37 | 1         |
| SMCA_36d-SDCA_P_36d   | -17474121  | -45320205.37 | 10371963.37 | 0.7565843 |
| SMCA_3h-SDCA_P_36d    | -23067934  | -50914018.7  | 4778150.04  | 0.245165  |
| SMCA_P_36d-SDCA_P_36d | 11738500   | -16107584.04 | 39584584.7  | 0.9953652 |
| SM_3h-SM_36d          | -1053339.3 | -28899423.7  | 26792745.04 | 1         |
| SM_P_36d-SM_36d       | 19023771   | -8822313.37  | 46869855.37 | 0.6083638 |
| SMCA_36d-SM_36d       | 3959799    | -23886285.37 | 31805883.37 | 1         |
| SMCA_3h-SM_36d        | -1634014.3 | -29480098.7  | 26212070.04 | 1         |
| SMCA_P_36d-SM_36d     | 33172420   | 5326335.96   | 61018504.7  | 0.0054812 |

|                     |            |              |             |           |
|---------------------|------------|--------------|-------------|-----------|
| SM_P_36d-SM_3h      | 20077110   | -7768974.04  | 47923194.7  | 0.5027026 |
| SMCA_36d-SM_3h      | 5013138.3  | -22832946.04 | 32859222.7  | 1         |
| SMCA_3h-SM_3h       | -580675    | -28426759.37 | 27265409.37 | 1         |
| SMCA_P_36d-SM_3h    | 34225760   | 6379675.3    | 62071844.04 | 0.0034087 |
| SMCA_36d-SM_P_36d   | -15063972  | -42910056.37 | 12782112.37 | 0.922201  |
| SMCA_3h-SM_P_36d    | -20657785  | -48503869.7  | 7188299.04  | 0.4460487 |
| SMCA_P_36d-SM_P_36d | 14148649   | -13697435.04 | 41994733.7  | 0.9574464 |
| SMCA_3h-SMCA_36d    | -5593813.3 | -33439897.7  | 22252271.04 | 1         |
| SMCA_P_36d-SMCA_36d | 29212621   | 1366536.96   | 57058705.7  | 0.0293888 |
| SMCA_P_36d-SMCA_3h  | 34806435   | 6960350.3    | 62652519.04 | 0.0026124 |

**Table S4** Results of the PostHoc tests (Tukey test) of the ANOVA test considering microbial dehydrogenase activity and conditions.

|                  | diff     | lwr      | upr      | p adj    |
|------------------|----------|----------|----------|----------|
| S_3h-S_36d       | 23.79207 | 2.285862 | 45.29828 | 0.015295 |
| S_P_36d-S_36d    | 16.46559 | -5.04062 | 37.97179 | 0.38456  |
| SC_36d-S_36d     | 17.17477 | -4.33144 | 38.68098 | 0.306692 |
| SC_3h-S_36d      | 17.11811 | -4.3881  | 38.62432 | 0.312551 |
| SC_P_36d-S_36d   | 15.60732 | -5.89888 | 37.11353 | 0.489741 |
| SCA_36d-S_36d    | 20.34865 | -1.15756 | 41.85486 | 0.086456 |
| SCA_3h-S_36d     | 33.2076  | 11.70139 | 54.71381 | 4.88E-05 |
| SCA_P_36d-S_36d  | 26.59106 | 5.08485  | 48.09726 | 0.003105 |
| SCD_36d-S_36d    | 22.315   | 0.808793 | 43.82121 | 0.033359 |
| SCD_3h-S_36d     | 31.6905  | 10.18429 | 53.19671 | 0.000131 |
| SCD_P_36d-S_36d  | 41.17358 | 19.66737 | 62.67979 | 2E-07    |
| SCM_36d-S_36d    | 35.21578 | 13.70957 | 56.72199 | 0.000013 |
| SCM_3h-S_36d     | 65.21027 | 43.70407 | 86.71648 | 0        |
| SCM_P_36d-S_36d  | 35.08578 | 13.57958 | 56.59199 | 1.42E-05 |
| SD_36d-S_36d     | 13.28488 | -8.22132 | 34.79109 | 0.78019  |
| SD_3h-S_36d      | 27.30317 | 5.796965 | 48.80938 | 0.00203  |
| SD_P_36d-S_36d   | 48.88047 | 27.37427 | 70.38668 | 0        |
| SDCA_36d-S_36d   | 18.9224  | -2.5838  | 40.42861 | 0.16007  |
| SDCA_3h-S_36d    | 37.55615 | 16.04994 | 59.06236 | 2.7E-06  |
| SDCA_P_36d-S_36d | 36.05894 | 14.55274 | 57.56515 | 7.4E-06  |
| SM_36d-S_36d     | 30.11086 | 8.60465  | 51.61706 | 0.000358 |
| SM_3h-S_36d      | 41.30084 | 19.79463 | 62.80705 | 2E-07    |
| SM_P_36d-S_36d   | 47.17022 | 25.66401 | 68.67642 | 0        |
| SMCA_36d-S_36d   | 25.52704 | 4.020832 | 47.03325 | 0.005783 |
| SMCA_3h-S_36d    | 23.09762 | 1.59141  | 44.60382 | 0.022204 |
| SMCA_P_36d-S_36d | 25.18874 | 3.682533 | 46.69495 | 0.00702  |
| S_P_36d-S_3h     | -7.32648 | -28.8327 | 14.17972 | 0.999818 |
| SC_36d-S_3h      | -6.6173  | -28.1235 | 14.88891 | 0.999969 |
| SC_3h-S_3h       | -6.67396 | -28.1802 | 14.83225 | 0.999964 |
| SC_P_36d-S_3h    | -8.18475 | -29.691  | 13.32146 | 0.99893  |
| SCA_36d-S_3h     | -3.44342 | -24.9496 | 18.06279 | 1        |
| SCA_3h-S_3h      | 9.41553  | -12.0907 | 30.92174 | 0.992369 |
| SCA_P_36d-S_3h   | 2.798988 | -18.7072 | 24.3052  | 1        |
| SCD_36d-S_3h     | -1.47707 | -22.9833 | 20.02914 | 1        |
| SCD_3h-S_3h      | 7.89843  | -13.6078 | 29.40464 | 0.999382 |

---

|                    |          |          |          |          |
|--------------------|----------|----------|----------|----------|
| SCD_P_36d-S_3h     | 17.38151 | -4.1247  | 38.88772 | 0.285887 |
| SCM_36d-S_3h       | 11.42371 | -10.0825 | 32.92992 | 0.934254 |
| SCM_3h-S_3h        | 41.41821 | 19.912   | 62.92441 | 2E-07    |
| SCM_P_36d-S_3h     | 11.29372 | -10.2125 | 32.79992 | 0.941021 |
| SD_36d-S_3h        | -10.5072 | -32.0134 | 10.99902 | 0.971871 |
| SD_3h-S_3h         | 3.511103 | -17.9951 | 25.01731 | 1        |
| SD_P_36d-S_3h      | 25.0884  | 3.582196 | 46.59461 | 0.007433 |
| SDCA_36d-S_3h      | -4.86967 | -26.3759 | 16.63654 | 1        |
| SDCA_3h-S_3h       | 13.76408 | -7.74213 | 35.27029 | 0.725168 |
| SDCA_P_36d-S_3h    | 12.26687 | -9.23933 | 33.77308 | 0.877595 |
| SM_36d-S_3h        | 6.318788 | -15.1874 | 27.825   | 0.999987 |
| SM_3h-S_3h         | 17.50877 | -3.99743 | 39.01498 | 0.273532 |
| SM_P_36d-S_3h      | 23.37815 | 1.871939 | 44.88435 | 0.019124 |
| SMCA_36d-S_3h      | 1.73497  | -19.7712 | 23.24118 | 1        |
| SMCA_3h-S_3h       | -0.69445 | -22.2007 | 20.81175 | 1        |
| SMCA_P_36d-S_3h    | 1.396672 | -20.1095 | 22.90288 | 1        |
| SC_36d-S_P_36d     | 0.709185 | -20.797  | 22.21539 | 1        |
| SC_3h-S_P_36d      | 0.652524 | -20.8537 | 22.15873 | 1        |
| SC_P_36d-S_P_36d   | -0.85826 | -22.3645 | 20.64794 | 1        |
| SCA_36d-S_P_36d    | 3.883064 | -17.6231 | 25.38927 | 1        |
| SCA_3h-S_P_36d     | 16.74201 | -4.76419 | 38.24822 | 0.353072 |
| SCA_P_36d-S_P_36d  | 10.12547 | -11.3807 | 31.63168 | 0.981448 |
| SCD_36d-S_P_36d    | 5.849414 | -15.6568 | 27.35562 | 0.999997 |
| SCD_3h-S_P_36d     | 15.22491 | -6.28129 | 36.73112 | 0.539033 |
| SCD_P_36d-S_P_36d  | 24.70799 | 3.201786 | 46.2142  | 0.009216 |
| SCM_36d-S_P_36d    | 18.75019 | -2.75601 | 40.2564  | 0.171589 |
| SCM_3h-S_P_36d     | 48.74469 | 27.23848 | 70.2509  | 0        |
| SCM_P_36d-S_P_36d  | 18.6202  | -2.88601 | 40.1264  | 0.180696 |
| SD_36d-S_P_36d     | -3.1807  | -24.6869 | 18.32551 | 1        |
| SD_3h-S_P_36d      | 10.83759 | -10.6686 | 32.34379 | 0.960905 |
| SD_P_36d-S_P_36d   | 32.41489 | 10.90868 | 53.92109 | 8.17E-05 |
| SDCA_36d-S_P_36d   | 2.456818 | -19.0494 | 23.96302 | 1        |
| SDCA_3h-S_P_36d    | 21.09056 | -0.41564 | 42.59677 | 0.061139 |
| SDCA_P_36d-S_P_36d | 19.59336 | -1.91285 | 41.09956 | 0.120849 |
| SM_36d-S_P_36d     | 13.64527 | -7.86094 | 35.15148 | 0.73925  |
| SM_3h-S_P_36d      | 24.83526 | 3.329048 | 46.34146 | 0.008579 |
| SM_P_36d-S_P_36d   | 30.70463 | 9.198422 | 52.21084 | 0.000246 |
| SMCA_36d-S_P_36d   | 9.061453 | -12.4448 | 30.56766 | 0.995396 |
| SMCA_3h-S_P_36d    | 6.63203  | -14.8742 | 28.13824 | 0.999968 |
| SMCA_P_36d-S_P_36d | 8.723154 | -12.7831 | 30.22936 | 0.997279 |
| SC_3h-SC_36d       | -0.05666 | -21.5629 | 21.44955 | 1        |
| SC_P_36d-SC_36d    | -1.56745 | -23.0737 | 19.93876 | 1        |
| SCA_36d-SC_36d     | 3.173879 | -18.3323 | 24.68009 | 1        |
| SCA_3h-SC_36d      | 16.03283 | -5.47338 | 37.53904 | 0.436384 |
| SCA_P_36d-SC_36d   | 9.416286 | -12.0899 | 30.92249 | 0.992361 |
| SCD_36d-SC_36d     | 5.140229 | -16.366  | 26.64644 | 1        |
| SCD_3h-SC_36d      | 14.51573 | -6.99048 | 36.02194 | 0.631243 |
| SCD_P_36d-SC_36d   | 23.99881 | 2.492602 | 45.50502 | 0.013662 |
| SCM_36d-SC_36d     | 18.04101 | -3.4652  | 39.54721 | 0.225694 |

---

|                    |          |          |          |          |
|--------------------|----------|----------|----------|----------|
| SCM_3h-SC_36d      | 48.0355  | 26.5293  | 69.54171 | 0        |
| SCM_P_36d-SC_36d   | 17.91101 | -3.59519 | 39.41722 | 0.236803 |
| SD_36d-SC_36d      | -3.88989 | -25.3961 | 17.61632 | 1        |
| SD_3h-SC_36d       | 10.1284  | -11.3778 | 31.63461 | 0.981386 |
| SD_P_36d-SC_36d    | 31.7057  | 10.19949 | 53.21191 | 0.000129 |
| SDCA_36d-SC_36d    | 1.747633 | -19.7586 | 23.25384 | 1        |
| SDCA_3h-SC_36d     | 20.38138 | -1.12483 | 41.88759 | 0.085175 |
| SDCA_P_36d-SC_36d  | 18.88417 | -2.62204 | 40.39038 | 0.162575 |
| SM_36d-SC_36d      | 12.93609 | -8.57012 | 34.44229 | 0.816861 |
| SM_3h-SC_36d       | 24.12607 | 2.619864 | 45.63228 | 0.012739 |
| SM_P_36d-SC_36d    | 29.99544 | 8.489237 | 51.50165 | 0.000385 |
| SMCA_36d-SC_36d    | 8.352268 | -13.1539 | 29.85848 | 0.99855  |
| SMCA_3h-SC_36d     | 5.922846 | -15.5834 | 27.42905 | 0.999996 |
| SMCA_P_36d-SC_36d  | 8.01397  | -13.4922 | 29.52018 | 0.999225 |
| SC_P_36d-SC_3h     | -1.51079 | -23.017  | 19.99542 | 1        |
| SCA_36d-SC_3h      | 3.23054  | -18.2757 | 24.73675 | 1        |
| SCA_3h-SC_3h       | 16.08949 | -5.41672 | 37.5957  | 0.429442 |
| SCA_P_36d-SC_3h    | 9.472947 | -12.0333 | 30.97915 | 0.991752 |
| SCD_36d-SC_3h      | 5.19689  | -16.3093 | 26.7031  | 1        |
| SCD_3h-SC_3h       | 14.57239 | -6.93382 | 36.0786  | 0.623929 |
| SCD_P_36d-SC_3h    | 24.05547 | 2.549263 | 45.56168 | 0.013244 |
| SCM_36d-SC_3h      | 18.09767 | -3.40854 | 39.60388 | 0.220968 |
| SCM_3h-SC_3h       | 48.09217 | 26.58596 | 69.59837 | 0        |
| SCM_P_36d-SC_3h    | 17.96767 | -3.53853 | 39.47388 | 0.231915 |
| SD_36d-SC_3h       | -3.83323 | -25.3394 | 17.67298 | 1        |
| SD_3h-SC_3h        | 10.18506 | -11.3211 | 31.69127 | 0.98015  |
| SD_P_36d-SC_3h     | 31.76236 | 10.25616 | 53.26857 | 0.000125 |
| SDCA_36d-SC_3h     | 1.804294 | -19.7019 | 23.3105  | 1        |
| SDCA_3h-SC_3h      | 20.43804 | -1.06817 | 41.94425 | 0.082995 |
| SDCA_P_36d-SC_3h   | 18.94083 | -2.56537 | 40.44704 | 0.158874 |
| SM_36d-SC_3h       | 12.99275 | -8.51346 | 34.49895 | 0.811121 |
| SM_3h-SC_3h        | 24.18273 | 2.676525 | 45.68894 | 0.012347 |
| SM_P_36d-SC_3h     | 30.05211 | 8.545898 | 51.55831 | 0.000372 |
| SMCA_36d-SC_3h     | 8.408929 | -13.0973 | 29.91514 | 0.998398 |
| SMCA_3h-SC_3h      | 5.979507 | -15.5267 | 27.48571 | 0.999995 |
| SMCA_P_36d-SC_3h   | 8.070631 | -13.4356 | 29.57684 | 0.999136 |
| SCA_36d-SC_P_36d   | 4.741328 | -16.7649 | 26.24754 | 1        |
| SCA_3h-SC_P_36d    | 17.60028 | -3.90593 | 39.10648 | 0.264866 |
| SCA_P_36d-SC_P_36d | 10.98374 | -10.5225 | 32.48994 | 0.955163 |
| SCD_36d-SC_P_36d   | 6.707678 | -14.7985 | 28.21389 | 0.999961 |
| SCD_3h-SC_P_36d    | 16.08318 | -5.42303 | 37.58938 | 0.430213 |
| SCD_P_36d-SC_P_36d | 25.56626 | 4.06005  | 47.07246 | 0.005653 |
| SCM_36d-SC_P_36d   | 19.60846 | -1.89775 | 41.11466 | 0.120065 |
| SCM_3h-SC_P_36d    | 49.60295 | 28.09675 | 71.10916 | 0        |
| SCM_P_36d-SC_P_36d | 19.47846 | -2.02775 | 40.98467 | 0.126952 |
| SD_36d-SC_P_36d    | -2.32244 | -23.8286 | 19.18377 | 1        |
| SD_3h-SC_P_36d     | 11.69585 | -9.81036 | 33.20206 | 0.918416 |
| SD_P_36d-SC_P_36d  | 33.27315 | 11.76694 | 54.77936 | 4.67E-05 |
| SDCA_36d-SC_P_36d  | 3.315082 | -18.1911 | 24.82129 | 1        |

|                     |          |          |          |          |
|---------------------|----------|----------|----------|----------|
| SDCA_3h-SC_P_36d    | 21.94883 | 0.442621 | 43.45504 | 0.040151 |
| SDCA_P_36d-SC_P_36d | 20.45162 | -1.05459 | 41.95783 | 0.08248  |
| SM_36d-SC_P_36d     | 14.50354 | -7.00267 | 36.00974 | 0.632815 |
| SM_3h-SC_P_36d      | 25.69352 | 4.187312 | 47.19973 | 0.005253 |
| SM_P_36d-SC_P_36d   | 31.56289 | 10.05669 | 53.0691  | 0.000142 |
| SMCA_36d-SC_P_36d   | 9.919717 | -11.5865 | 31.42592 | 0.985428 |
| SMCA_3h-SC_P_36d    | 7.490294 | -14.0159 | 28.9965  | 0.999737 |
| SMCA_P_36d-SC_P_36d | 9.581418 | -11.9248 | 31.08763 | 0.990474 |
| SCA_3h-SCA_36d      | 12.85895 | -8.64726 | 34.36516 | 0.824532 |
| SCA_P_36d-SCA_36d   | 6.242407 | -15.2638 | 27.74861 | 0.99999  |
| SCD_36d-SCA_36d     | 1.96635  | -19.5399 | 23.47256 | 1        |
| SCD_3h-SCA_36d      | 11.34185 | -10.1644 | 32.84806 | 0.938574 |
| SCD_P_36d-SCA_36d   | 20.82493 | -0.68128 | 42.33114 | 0.069346 |
| SCM_36d-SCA_36d     | 14.86713 | -6.63908 | 36.37334 | 0.585643 |
| SCM_3h-SCA_36d      | 44.86162 | 23.35542 | 66.36783 | 0        |
| SCM_P_36d-SCA_36d   | 14.73713 | -6.76907 | 36.24334 | 0.602567 |
| SD_36d-SCA_36d      | -7.06377 | -28.57   | 14.44244 | 0.999902 |
| SD_3h-SCA_36d       | 6.954522 | -14.5517 | 28.46073 | 0.999926 |
| SD_P_36d-SCA_36d    | 28.53182 | 7.025615 | 50.03803 | 0.00096  |
| SDCA_36d-SCA_36d    | -1.42625 | -22.9325 | 20.07996 | 1        |
| SDCA_3h-SCA_36d     | 17.2075  | -4.29871 | 38.71371 | 0.303339 |
| SDCA_P_36d-SCA_36d  | 15.71029 | -5.79591 | 37.2165  | 0.476653 |
| SM_36d-SCA_36d      | 9.762207 | -11.744  | 31.26841 | 0.987991 |
| SM_3h-SCA_36d       | 20.95219 | -0.55402 | 42.4584  | 0.065302 |
| SM_P_36d-SCA_36d    | 26.82157 | 5.315358 | 48.32777 | 0.002708 |
| SMCA_36d-SCA_36d    | 5.178389 | -16.3278 | 26.6846  | 1        |
| SMCA_3h-SCA_36d     | 2.748966 | -18.7572 | 24.25517 | 1        |
| SMCA_P_36d-SCA_36d  | 4.84009  | -16.6661 | 26.3463  | 1        |
| SCA_P_36d-SCA_3h    | -6.61654 | -28.1227 | 14.88967 | 0.999969 |
| SCD_36d-SCA_3h      | -10.8926 | -32.3988 | 10.61361 | 0.958811 |
| SCD_3h-SCA_3h       | -1.5171  | -23.0233 | 19.98911 | 1        |
| SCD_P_36d-SCA_3h    | 7.965981 | -13.5402 | 29.47219 | 0.999294 |
| SCM_36d-SCA_3h      | 2.008179 | -19.498  | 23.51439 | 1        |
| SCM_3h-SCA_3h       | 32.00268 | 10.49647 | 53.50888 | 0.000107 |
| SCM_P_36d-SCA_3h    | 1.878185 | -19.628  | 23.38439 | 1        |
| SD_36d-SCA_3h       | -19.9227 | -41.4289 | 1.583492 | 0.104671 |
| SD_3h-SCA_3h        | -5.90443 | -27.4106 | 15.60178 | 0.999996 |
| SD_P_36d-SCA_3h     | 15.67287 | -5.83333 | 37.17908 | 0.481398 |
| SDCA_36d-SCA_3h     | -14.2852 | -35.7914 | 7.221012 | 0.66075  |
| SDCA_3h-SCA_3h      | 4.348551 | -17.1577 | 25.85476 | 1        |
| SDCA_P_36d-SCA_3h   | 2.851343 | -18.6549 | 24.35755 | 1        |
| SM_36d-SCA_3h       | -3.09674 | -24.6029 | 18.40947 | 1        |
| SM_3h-SCA_3h        | 8.093242 | -13.413  | 29.59945 | 0.999098 |
| SM_P_36d-SCA_3h     | 13.96262 | -7.54359 | 35.46882 | 0.701087 |
| SMCA_36d-SCA_3h     | -7.68056 | -29.1868 | 13.82565 | 0.999604 |
| SMCA_3h-SCA_3h      | -10.11   | -31.6162 | 11.39622 | 0.981775 |
| SMCA_P_36d-SCA_3h   | -8.01886 | -29.5251 | 13.48735 | 0.999218 |
| SCD_36d-SCA_P_36d   | -4.27606 | -25.7823 | 17.23015 | 1        |
| SCD_3h-SCA_P_36d    | 5.099442 | -16.4068 | 26.60565 | 1        |

|                      |          |          |          |          |
|----------------------|----------|----------|----------|----------|
| SCD_P_36d-SCA_P_36d  | 14.58252 | -6.92368 | 36.08873 | 0.622619 |
| SCM_36d-SCA_P_36d    | 8.624721 | -12.8815 | 30.13093 | 0.997685 |
| SCM_3h-SCA_P_36d     | 38.61922 | 17.11301 | 60.12542 | 1.3E-06  |
| SCM_P_36d-SCA_P_36d  | 8.494727 | -13.0115 | 30.00093 | 0.998141 |
| SD_36d-SCA_P_36d     | -13.3062 | -34.8124 | 8.200034 | 0.777853 |
| SD_3h-SCA_P_36d      | 0.712115 | -20.7941 | 22.21832 | 1        |
| SD_P_36d-SCA_P_36d   | 22.28942 | 0.783208 | 43.79562 | 0.033797 |
| SDCA_36d-SCA_P_36d   | -7.66865 | -29.1749 | 13.83755 | 0.999614 |
| SDCA_3h-SCA_P_36d    | 10.96509 | -10.5411 | 32.4713  | 0.955928 |
| SDCA_P_36d-SCA_P_36d | 9.467885 | -12.0383 | 30.97409 | 0.991808 |
| SM_36d-SCA_P_36d     | 3.5198   | -17.9864 | 25.02601 | 1        |
| SM_3h-SCA_P_36d      | 14.70978 | -6.79642 | 36.21599 | 0.606121 |
| SM_P_36d-SCA_P_36d   | 20.57916 | -0.92705 | 42.08537 | 0.077771 |
| SMCA_36d-SCA_P_36d   | -1.06402 | -22.5702 | 20.44219 | 1        |
| SMCA_3h-SCA_P_36d    | -3.49344 | -24.9996 | 18.01277 | 1        |
| SMCA_P_36d-SCA_P_36d | -1.40232 | -22.9085 | 20.10389 | 1        |
| SCD_3h-SCD_36d       | 9.375499 | -12.1307 | 30.88171 | 0.992777 |
| SCD_P_36d-SCD_36d    | 18.85858 | -2.64763 | 40.36479 | 0.164268 |
| SCM_36d-SCD_36d      | 12.90078 | -8.60543 | 34.40699 | 0.820393 |
| SCM_3h-SCD_36d       | 42.89527 | 21.38907 | 64.40148 | 1E-07    |
| SCM_P_36d-SCD_36d    | 12.77078 | -8.73542 | 34.27699 | 0.833095 |
| SD_36d-SCD_36d       | -9.03012 | -30.5363 | 12.47609 | 0.995607 |
| SD_3h-SCD_36d        | 4.988172 | -16.518  | 26.49438 | 1        |
| SD_P_36d-SCD_36d     | 26.56547 | 5.059265 | 48.07168 | 0.003153 |
| SDCA_36d-SCD_36d     | -3.3926  | -24.8988 | 18.11361 | 1        |
| SDCA_3h-SCD_36d      | 15.24115 | -6.26506 | 36.74736 | 0.536924 |
| SDCA_P_36d-SCD_36d   | 13.74394 | -7.76227 | 35.25015 | 0.727573 |
| SM_36d-SCD_36d       | 7.795857 | -13.7103 | 29.30206 | 0.999498 |
| SM_3h-SCD_36d        | 18.98584 | -2.52037 | 40.49205 | 0.155981 |
| SM_P_36d-SCD_36d     | 24.85522 | 3.349008 | 46.36142 | 0.008483 |
| SMCA_36d-SCD_36d     | 3.212039 | -18.2942 | 24.71825 | 1        |
| SMCA_3h-SCD_36d      | 0.782616 | -20.7236 | 22.28882 | 1        |
| SMCA_P_36d-SCD_36d   | 2.87374  | -18.6325 | 24.37995 | 1        |
| SCD_P_36d-SCD_3h     | 9.483081 | -12.0231 | 30.98929 | 0.991639 |
| SCM_36d-SCD_3h       | 3.525279 | -17.9809 | 25.03149 | 1        |
| SCM_3h-SCD_3h        | 33.51978 | 12.01357 | 55.02598 | 3.98E-05 |
| SCM_P_36d-SCD_3h     | 3.395285 | -18.1109 | 24.90149 | 1        |
| SD_36d-SCD_3h        | -18.4056 | -39.9118 | 3.100593 | 0.196517 |
| SD_3h-SCD_3h         | -4.38733 | -25.8935 | 17.11888 | 1        |
| SD_P_36d-SCD_3h      | 17.18997 | -4.31623 | 38.69618 | 0.305132 |
| SDCA_36d-SCD_3h      | -12.7681 | -34.2743 | 8.738112 | 0.833352 |
| SDCA_3h-SCD_3h       | 5.865651 | -15.6406 | 27.37186 | 0.999997 |
| SDCA_P_36d-SCD_3h    | 4.368443 | -17.1378 | 25.87465 | 1        |
| SM_36d-SCD_3h        | -1.57964 | -23.0858 | 19.92657 | 1        |
| SM_3h-SCD_3h         | 9.610343 | -11.8959 | 31.11655 | 0.990107 |
| SM_P_36d-SCD_3h      | 15.47972 | -6.02649 | 36.98592 | 0.506084 |
| SMCA_36d-SCD_3h      | -6.16346 | -27.6697 | 15.34275 | 0.999992 |
| SMCA_3h-SCD_3h       | -8.59288 | -30.0991 | 12.91332 | 0.997805 |
| SMCA_P_36d-SCD_3h    | -6.50176 | -28.008  | 15.00445 | 0.999978 |

|                      |          |          |          |          |
|----------------------|----------|----------|----------|----------|
| SCM_36d-SCD_P_36d    | -5.9578  | -27.464  | 15.54841 | 0.999996 |
| SCM_3h-SCD_P_36d     | 24.0367  | 2.530488 | 45.5429  | 0.013381 |
| SCM_P_36d-SCD_P_36d  | -6.0878  | -27.594  | 15.41841 | 0.999994 |
| SD_36d-SCD_P_36d     | -27.8887 | -49.3949 | -6.38249 | 0.001424 |
| SD_3h-SCD_P_36d      | -13.8704 | -35.3766 | 7.6358   | 0.712352 |
| SD_P_36d-SCD_P_36d   | 7.706893 | -13.7993 | 29.2131  | 0.999582 |
| SDCA_36d-SCD_P_36d   | -22.2512 | -43.7574 | -0.74497 | 0.034462 |
| SDCA_3h-SCD_P_36d    | -3.61743 | -25.1236 | 17.88878 | 1        |
| SDCA_P_36d-SCD_P_36d | -5.11464 | -26.6208 | 16.39157 | 1        |
| SM_36d-SCD_P_36d     | -11.0627 | -32.5689 | 10.44348 | 0.951819 |
| SM_3h-SCD_P_36d      | 0.127262 | -21.3789 | 21.63347 | 1        |
| SM_P_36d-SCD_P_36d   | 5.996636 | -15.5096 | 27.50284 | 0.999995 |
| SMCA_36d-SCD_P_36d   | -15.6465 | -37.1527 | 5.859666 | 0.484745 |
| SMCA_3h-SCD_P_36d    | -18.076  | -39.5822 | 3.430244 | 0.22277  |
| SMCA_P_36d-SCD_P_36d | -15.9848 | -37.491  | 5.521368 | 0.442296 |
| SCM_3h-SCM_36d       | 29.9945  | 8.488289 | 51.5007  | 0.000385 |
| SCM_P_36d-SCM_36d    | -0.12999 | -21.6362 | 21.37621 | 1        |
| SD_36d-SCM_36d       | -21.9309 | -43.4371 | -0.42469 | 0.040514 |
| SD_3h-SCM_36d        | -7.91261 | -29.4188 | 13.5936  | 0.999365 |
| SD_P_36d-SCM_36d     | 13.66469 | -7.84151 | 35.1709  | 0.736966 |
| SDCA_36d-SCM_36d     | -16.2934 | -37.7996 | 5.212833 | 0.404839 |
| SDCA_3h-SCM_36d      | 2.340372 | -19.1658 | 23.84658 | 1        |
| SDCA_P_36d-SCM_36d   | 0.843164 | -20.663  | 22.34937 | 1        |
| SM_36d-SCM_36d       | -5.10492 | -26.6111 | 16.40129 | 1        |
| SM_3h-SCM_36d        | 6.085063 | -15.4211 | 27.59127 | 0.999994 |
| SM_P_36d-SCM_36d     | 11.95444 | -9.55177 | 33.46064 | 0.901214 |
| SMCA_36d-SCM_36d     | -9.68874 | -31.1949 | 11.81747 | 0.989056 |
| SMCA_3h-SCM_36d      | -12.1182 | -33.6244 | 9.388045 | 0.889223 |
| SMCA_P_36d-SCM_36d   | -10.027  | -31.5332 | 11.47917 | 0.983447 |
| SCM_P_36d-SCM_3h     | -30.1245 | -51.6307 | -8.61828 | 0.000355 |
| SD_36d-SCM_3h        | -51.9254 | -73.4316 | -30.4192 | 0        |
| SD_3h-SCM_3h         | -37.9071 | -59.4133 | -16.4009 | 2.2E-06  |
| SD_P_36d-SCM_3h      | -16.3298 | -37.836  | 5.176405 | 0.400509 |
| SDCA_36d-SCM_3h      | -46.2879 | -67.7941 | -24.7817 | 0        |
| SDCA_3h-SCM_3h       | -27.6541 | -49.1603 | -6.14792 | 0.001642 |
| SDCA_P_36d-SCM_3h    | -29.1513 | -50.6575 | -7.64513 | 0.000654 |
| SM_36d-SCM_3h        | -35.0994 | -56.6056 | -13.5932 | 0.000014 |
| SM_3h-SCM_3h         | -23.9094 | -45.4156 | -2.40323 | 0.014347 |
| SM_P_36d-SCM_3h      | -18.0401 | -39.5463 | 3.466147 | 0.225774 |
| SMCA_36d-SCM_3h      | -39.6832 | -61.1894 | -18.177  | 7E-07    |
| SMCA_3h-SCM_3h       | -42.1127 | -63.6189 | -20.6065 | 1E-07    |
| SMCA_P_36d-SCM_3h    | -40.0215 | -61.5277 | -18.5153 | 5E-07    |
| SD_36d-SCM_P_36d     | -21.8009 | -43.3071 | -0.29469 | 0.04323  |
| SD_3h-SCM_P_36d      | -7.78261 | -29.2888 | 13.7236  | 0.999511 |
| SD_P_36d-SCM_P_36d   | 13.79469 | -7.71152 | 35.3009  | 0.721499 |
| SDCA_36d-SCM_P_36d   | -16.1634 | -37.6696 | 5.342827 | 0.420455 |
| SDCA_3h-SCM_P_36d    | 2.470366 | -19.0358 | 23.97657 | 1        |
| SDCA_P_36d-SCM_P_36d | 0.973158 | -20.533  | 22.47937 | 1        |
| SM_36d-SCM_P_36d     | -4.97493 | -26.4811 | 16.53128 | 1        |

|                      |          |          |          |          |
|----------------------|----------|----------|----------|----------|
| SM_3h-SCM_P_36d      | 6.215058 | -15.2911 | 27.72126 | 0.99999  |
| SM_P_36d-SCM_P_36d   | 12.08443 | -9.42178 | 33.59064 | 0.891763 |
| SMCA_36d-SCM_P_36d   | -9.55875 | -31.065  | 11.94746 | 0.990753 |
| SMCA_3h-SCM_P_36d    | -11.9882 | -33.4944 | 9.51804  | 0.898813 |
| SMCA_P_36d-SCM_P_36d | -9.89704 | -31.4033 | 11.60916 | 0.985822 |
| SD_3h-SD_36d         | 14.01829 | -7.48792 | 35.5245  | 0.694224 |
| SD_P_36d-SD_36d      | 35.59559 | 14.08938 | 57.1018  | 1.01E-05 |
| SDCA_36d-SD_36d      | 5.637519 | -15.8687 | 27.14373 | 0.999999 |
| SDCA_3h-SD_36d       | 24.27127 | 2.765059 | 45.77747 | 0.011758 |
| SDCA_P_36d-SD_36d    | 22.77406 | 1.267851 | 44.28026 | 0.026319 |
| SM_36d-SD_36d        | 16.82597 | -4.68023 | 38.33218 | 0.343786 |
| SM_3h-SD_36d         | 28.01596 | 6.50975  | 49.52216 | 0.001317 |
| SM_P_36d-SD_36d      | 33.88533 | 12.37912 | 55.39154 | 3.13E-05 |
| SMCA_36d-SD_36d      | 12.24215 | -9.26405 | 33.74836 | 0.879576 |
| SMCA_3h-SD_36d       | 9.812732 | -11.6935 | 31.31894 | 0.987212 |
| SMCA_P_36d-SD_36d    | 11.90386 | -9.60235 | 33.41006 | 0.904746 |
| SD_P_36d-SD_3h       | 21.5773  | 0.071093 | 43.08351 | 0.048286 |
| SDCA_36d-SD_3h       | -8.38077 | -29.887  | 13.12544 | 0.998475 |
| SDCA_3h-SD_3h        | 10.25298 | -11.2532 | 31.75919 | 0.978585 |
| SDCA_P_36d-SD_3h     | 8.75577  | -12.7504 | 30.26198 | 0.997132 |
| SM_36d-SD_3h         | 2.807685 | -18.6985 | 24.31389 | 1        |
| SM_3h-SD_3h          | 13.99767 | -7.50854 | 35.50388 | 0.696771 |
| SM_P_36d-SD_3h       | 19.86704 | -1.63916 | 41.37325 | 0.107272 |
| SMCA_36d-SD_3h       | -1.77613 | -23.2823 | 19.73007 | 1        |
| SMCA_3h-SD_3h        | -4.20556 | -25.7118 | 17.30065 | 1        |
| SMCA_P_36d-SD_3h     | -2.11443 | -23.6206 | 19.39178 | 1        |
| SDCA_36d-SD_P_36d    | -29.9581 | -51.4643 | -8.45186 | 0.000394 |
| SDCA_3h-SD_P_36d     | -11.3243 | -32.8305 | 10.18189 | 0.939473 |
| SDCA_P_36d-SD_P_36d  | -12.8215 | -34.3277 | 8.684677 | 0.828193 |
| SM_36d-SD_P_36d      | -18.7696 | -40.2758 | 2.736592 | 0.170259 |
| SM_3h-SD_P_36d       | -7.57963 | -29.0858 | 13.92658 | 0.999681 |
| SM_P_36d-SD_P_36d    | -1.71026 | -23.2165 | 19.79595 | 1        |
| SMCA_36d-SD_P_36d    | -23.3534 | -44.8596 | -1.84723 | 0.019379 |
| SMCA_3h-SD_P_36d     | -25.7829 | -47.2891 | -4.27665 | 0.004988 |
| SMCA_P_36d-SD_P_36d  | -23.6917 | -45.1979 | -2.18552 | 0.016152 |
| SDCA_3h-SDCA_36d     | 18.63375 | -2.87246 | 40.13995 | 0.17973  |
| SDCA_P_36d-SDCA_36d  | 17.13654 | -4.36967 | 38.64275 | 0.310638 |
| SM_36d-SDCA_36d      | 11.18845 | -10.3178 | 32.69466 | 0.946132 |
| SM_3h-SDCA_36d       | 22.37844 | 0.872231 | 43.88464 | 0.032294 |
| SM_P_36d-SDCA_36d    | 28.24781 | 6.741604 | 49.75402 | 0.001143 |
| SMCA_36d-SDCA_36d    | 6.604635 | -14.9016 | 28.11084 | 0.99997  |
| SMCA_3h-SDCA_36d     | 4.175213 | -17.331  | 25.68142 | 1        |
| SMCA_P_36d-SDCA_36d  | 6.266337 | -15.2399 | 27.77254 | 0.999989 |
| SDCA_P_36d-SDCA_3h   | -1.49721 | -23.0034 | 20.009   | 1        |
| SM_36d-SDCA_3h       | -7.44529 | -28.9515 | 14.06091 | 0.999762 |
| SM_3h-SDCA_3h        | 3.744691 | -17.7615 | 25.2509  | 1        |
| SM_P_36d-SDCA_3h     | 9.614065 | -11.8921 | 31.12027 | 0.990059 |
| SMCA_36d-SDCA_3h     | -12.0291 | -33.5353 | 9.477096 | 0.895851 |
| SMCA_3h-SDCA_3h      | -14.4585 | -35.9647 | 7.047673 | 0.638604 |



|                       |          |          |          |          |
|-----------------------|----------|----------|----------|----------|
| SMCA_P_36d-SDCA_3h    | -12.3674 | -33.8736 | 9.138797 | 0.869338 |
| SM_36d-SDCA_P_36d     | -5.94808 | -27.4543 | 15.55812 | 0.999996 |
| SM_3h-SDCA_P_36d      | 5.241899 | -16.2643 | 26.74811 | 1        |
| SM_P_36d-SDCA_P_36d   | 11.11127 | -10.3949 | 32.61748 | 0.949676 |
| SMCA_36d-SDCA_P_36d   | -10.5319 | -32.0381 | 10.9743  | 0.971142 |
| SMCA_3h-SDCA_P_36d    | -12.9613 | -34.4675 | 8.544882 | 0.814315 |
| SMCA_P_36d-SDCA_P_36d | -10.8702 | -32.3764 | 10.63601 | 0.959673 |
| SM_3h-SM_36d          | 11.18998 | -10.3162 | 32.69619 | 0.94606  |
| SM_P_36d-SM_36d       | 17.05936 | -4.44685 | 38.56557 | 0.318695 |
| SMCA_36d-SM_36d       | -4.58382 | -26.09   | 16.92239 | 1        |
| SMCA_3h-SM_36d        | -7.01324 | -28.5194 | 14.49297 | 0.999914 |
| SMCA_P_36d-SM_36d     | -4.92212 | -26.4283 | 16.58409 | 1        |
| SM_P_36d-SM_3h        | 5.869374 | -15.6368 | 27.37558 | 0.999997 |
| SMCA_36d-SM_3h        | -15.7738 | -37.28   | 5.732404 | 0.468631 |
| SMCA_3h-SM_3h         | -18.2032 | -39.7094 | 3.302982 | 0.212353 |
| SMCA_P_36d-SM_3h      | -16.1121 | -37.6183 | 5.394106 | 0.426683 |
| SMCA_36d-SM_P_36d     | -21.6432 | -43.1494 | -0.13697 | 0.046745 |
| SMCA_3h-SM_P_36d      | -24.0726 | -45.5788 | -2.56639 | 0.01312  |
| SMCA_P_36d-SM_P_36d   | -21.9815 | -43.4877 | -0.47527 | 0.039499 |
| SMCA_3h-SMCA_36d      | -2.42942 | -23.9356 | 19.07678 | 1        |
| SMCA_P_36d-SMCA_36d   | -0.3383  | -21.8445 | 21.16791 | 1        |
| SMCA_P_36d-SMCA_3h    | 2.091124 | -19.4151 | 23.59733 | 1        |

**Table S5** PostHoc test (wilcox test, method=BH) performed on Kruskal-Wallis test considering ARG abundances and conditions.

|            | S_3h    | S_P_36d | S_36d   | SC_3h   | SC_P_36d | SC_36d  | SCA_3h  | SCA_P_36d |
|------------|---------|---------|---------|---------|----------|---------|---------|-----------|
| S_P_36d    | 0.33857 | -       | -       | -       | -        | -       | -       | -         |
| S_36d      | 0.25362 | 0.90481 | -       | -       | -        | -       | -       | -         |
| SC_3h      | 0.33719 | 0.48678 | 0.57249 | -       | -        | -       | -       | -         |
| SC_P_36d   | 0.21185 | 0.73582 | 0.92785 | 0.61733 | -        | -       | -       | -         |
| SC_36d     | 0.89158 | 0.09876 | 0.01014 | 0.12355 | 0.02033  | -       | -       | -         |
| SCA_3h     | 0.20533 | 1       | 0.49791 | 0.73582 | 0.73384  | 0.12355 | -       | -         |
| SCA_P_36d  | 0.73384 | 0.70434 | 0.62287 | 0.38224 | 0.50973  | 0.38914 | 0.83581 | -         |
| SCA_36d    | 0.96727 | 0.18638 | 0.07187 | 0.12355 | 0.06855  | 1       | 0.33857 | 0.48184   |
| SCD_3h     | 0.57729 | 0.40685 | 0.38914 | 0.24117 | 0.38914  | 0.57249 | 0.47677 | 0.51675   |
| SCD_P_36d  | 0.81406 | 0.0526  | 0.01431 | 0.0588  | 0.01431  | 0.77699 | 0.09876 | 0.34808   |
| SCD_36d    | 0.62287 | 0.0093  | 0.00106 | 0.02591 | 0.00255  | 0.62287 | 0.07155 | 0.07187   |
| SDCA_3h    | 0.83242 | 0.48678 | 0.38914 | 0.27449 | 0.38914  | 0.81406 | 0.47677 | 0.83581   |
| SDCA_P_36d | 0.27449 | 0.01156 | 0.00623 | 0.01331 | 0.00337  | 0.3546  | 0.06378 | 0.0424    |
| SDCA_36d   | 0.49791 | 0.0174  | 0.00529 | 0.02367 | 0.00623  | 0.49791 | 0.08013 | 0.09876   |
| SCM_3h     | 0.57729 | 0.42773 | 0.38914 | 0.24117 | 0.38914  | 0.58984 | 0.47677 | 0.51675   |
| SCM_P_36d  | 0.93706 | 0.11733 | 0.01908 | 0.09876 | 0.02033  | 0.71571 | 0.25362 | 0.37474   |
| SCM_36d    | 0.54415 | 0.02318 | 0.00678 | 0.02591 | 0.01156  | 0.73384 | 0.13697 | 0.1743    |
| SCMA_3h    | 0.8733  | 0.47677 | 0.38914 | 0.3546  | 0.40685  | 0.81406 | 0.47677 | 0.73384   |
| SCMA_P_36d | 0.62287 | 0.90481 | 0.96727 | 0.38224 | 0.62287  | 0.38279 | 1       | 0.73582   |
| SCMA_36d   | 0.3546  | 0.02367 | 0.02318 | 0.02242 | 0.01431  | 0.42103 | 0.09876 | 0.13031   |
| SD_3h      | 0.47677 | 0.38914 | 0.38914 | 0.20533 | 0.38914  | 0.45177 | 0.47677 | 0.45177   |
| SD_P_36d   | 0.31782 | 0.77903 | 0.99892 | 0.54415 | 0.98796  | 0.0174  | 0.61733 | 0.68775   |
| SD_36d     | 0.20034 | 0.73177 | 0.40435 | 0.49791 | 0.4798   | 0.12671 | 0.99405 | 0.6574    |

|            |         |           |           |           |            |            |          |         |
|------------|---------|-----------|-----------|-----------|------------|------------|----------|---------|
| SM_3h      | 0.70679 | 0.48678   | 0.40685   | 0.31695   | 0.42773    | 0.62287    | 0.47677  | 0.54415 |
| SM_P_36d   | 0.09876 | 0.3546    | 0.38914   | 0.86253   | 0.49172    | 0.00255    | 0.23565  | 0.27449 |
| SM_36d     | 0.78758 | 0.51675   | 0.3546    | 0.38914   | 0.38224    | 0.49791    | 0.73384  | 0.85632 |
|            | SCA_36d | SCD_3h    | SCD_P_36d | SCD_P_36d | SDCA_3h    | SDCA_P_36d | SDCA_36d |         |
| S_P_36d    | -       | -         | -         | -         | -          | -          | -        | -       |
| S_36d      | -       | -         | -         | -         | -          | -          | -        | -       |
| SC_3h      | -       | -         | -         | -         | -          | -          | -        | -       |
| SC_P_36d   | -       | -         | -         | -         | -          | -          | -        | -       |
| SC_36d     | -       | -         | -         | -         | -          | -          | -        | -       |
| SCA_3h     | -       | -         | -         | -         | -          | -          | -        | -       |
| SCA_P_36d  | -       | -         | -         | -         | -          | -          | -        | -       |
| SCA_36d    | -       | -         | -         | -         | -          | -          | -        | -       |
| SCD_3h     | 0.61733 | -         | -         | -         | -          | -          | -        | -       |
| SCD_P_36d  | 0.90481 | 0.51675   | -         | -         | -          | -          | -        | -       |
| SCD_36d    | 0.53817 | 0.62287   | 0.6574    | -         | -          | -          | -        | -       |
| SDCA_3h    | 0.90481 | 0.44611   | 0.78758   | 0.81406   | -          | -          | -        | -       |
| SDCA_P_36d | 0.33719 | 0.96727   | 0.23565   | 0.62287   | 0.3546     | -          | -        | -       |
| SDCA_36d   | 0.39459 | 0.7883    | 0.50537   | 0.75738   | 0.57249    | 0.90481    | -        | -       |
| SCM_3h     | 0.62287 | 0.90481   | 0.45177   | 0.71571   | 0.47677    | 0.99405    | 0.90481  | -       |
| SCM_P_36d  | 0.86985 | 0.51675   | 0.7883    | 0.38914   | 0.81406    | 0.25389    | 0.38914  | -       |
| SCM_36d    | 0.82775 | 0.62287   | 0.60883   | 0.75738   | 0.86253    | 0.38914    | 0.53817  | -       |
| SCMA_3h    | 0.86253 | 0.49791   | 0.89158   | 0.99405   | 0.90481    | 0.6574     | 0.71571  | -       |
| SCMA_P_36d | 0.30911 | 0.48678   | 0.38224   | 0.02596   | 0.62287    | 0.01156    | 0.03889  | -       |
| SCMA_36d   | 0.48184 | 0.81406   | 0.39205   | 0.90481   | 0.51675    | 0.70434    | 0.90481  | -       |
| SD_3h      | 0.42773 | 0.73582   | 0.38914   | 0.48678   | 0.20533    | 0.71571    | 0.7883   | -       |
| SD_P_36d   | 0.06855 | 0.38914   | 0.02367   | 0.00317   | 0.38914    | 0.00623    | 0.00623  | -       |
| SD_36d     | 0.40435 | 0.38914   | 0.02596   | 0.0174    | 0.38914    | 0.01536    | 0.02596  | -       |
| SM_3h      | 0.69082 | 0.83242   | 0.62287   | 0.73384   | 0.49791    | 0.90481    | 0.86253  | -       |
| SM_P_36d   | 0.01265 | 0.38914   | 0.00724   | 0.00089   | 0.38914    | 0.00106    | 0.00119  | -       |
| SM_36d     | 0.73177 | 0.58316   | 0.456     | 0.33719   | 0.99405    | 0.11508    | 0.27449  | -       |
|            | SCM_3h  | SCM_P_36d | SCM_36d   | SCMA_3h   | SCMA_P_36d | SCMA_36d   | SD_3h    |         |
| S_P_36d    | -       | -         | -         | -         | -          | -          | -        | -       |
| S_36d      | -       | -         | -         | -         | -          | -          | -        | -       |
| SC_3h      | -       | -         | -         | -         | -          | -          | -        | -       |
| SC_P_36d   | -       | -         | -         | -         | -          | -          | -        | -       |
| SC_36d     | -       | -         | -         | -         | -          | -          | -        | -       |
| SCA_3h     | -       | -         | -         | -         | -          | -          | -        | -       |
| SCA_P_36d  | -       | -         | -         | -         | -          | -          | -        | -       |
| SCA_36d    | -       | -         | -         | -         | -          | -          | -        | -       |
| SCD_3h     | -       | -         | -         | -         | -          | -          | -        | -       |
| SCD_P_36d  | -       | -         | -         | -         | -          | -          | -        | -       |
| SCD_36d    | -       | -         | -         | -         | -          | -          | -        | -       |
| SDCA_3h    | -       | -         | -         | -         | -          | -          | -        | -       |
| SDCA_P_36d | -       | -         | -         | -         | -          | -          | -        | -       |
| SDCA_36d   | -       | -         | -         | -         | -          | -          | -        | -       |
| SCM_3h     | -       | -         | -         | -         | -          | -          | -        | -       |
| SCM_P_36d  | 0.51675 | -         | -         | -         | -          | -          | -        | -       |
| SCM_36d    | 0.62287 | 0.6131    | -         | -         | -          | -          | -        | -       |
| SCMA_3h    | 0.57729 | 0.73384   | 0.96727   | -         | -          | -          | -        | -       |

|            |                 |               |              |                 |         |         |         |
|------------|-----------------|---------------|--------------|-----------------|---------|---------|---------|
| SCMA_P_36d | 0.45177         | 0.16284       | 0.02538      | 0.6574          | -       | -       | -       |
| SCMA_36d   | 0.89158         | 0.42103       | 0.62287      | 0.69082         | 0.02538 | -       | -       |
| SD_3h      | 0.57729         | 0.45177       | 0.38914      | 0.38472         | 0.38914 | 0.58984 | -       |
| SD_P_36d   | 0.38914         | 0.02367       | 0.01331      | 0.42773         | 0.83581 | 0.02318 | 0.38914 |
| SD_36d     | 0.38914         | 0.25389       | 0.06083      | 0.42738         | 1       | 0.04418 | 0.38914 |
| SM_3h      | 0.83242         | 0.57249       | 0.71571      | 0.57729         | 0.49791 | 0.86253 | 0.90481 |
| SM_P_36d   | 0.38914         | 0.00255       | 0.00255      | 0.38914         | 0.30911 | 0.00529 | 0.38914 |
| SM_36d     | 0.58316         | 0.54415       | 0.38914      | 0.83581         | 0.60883 | 0.27449 | 0.49791 |
|            | <b>SD_P_36d</b> | <b>SD_36d</b> | <b>SM_3h</b> | <b>SM_P_36d</b> |         |         |         |
| S_P_36d    | -               | -             | -            | -               |         |         |         |
| S_36d      | -               | -             | -            | -               |         |         |         |
| SC_3h      | -               | -             | -            | -               |         |         |         |
| SC_P_36d   | -               | -             | -            | -               |         |         |         |
| SC_36d     | -               | -             | -            | -               |         |         |         |
| SCA_3h     | -               | -             | -            | -               |         |         |         |
| SCA_P_36d  | -               | -             | -            | -               |         |         |         |
| SCA_36d    | -               | -             | -            | -               |         |         |         |
| SCD_3h     | -               | -             | -            | -               |         |         |         |
| SCD_P_36d  | -               | -             | -            | -               |         |         |         |
| SCD_36d    | -               | -             | -            | -               |         |         |         |
| SDCA_3h    | -               | -             | -            | -               |         |         |         |
| SDCA_P_36d | -               | -             | -            | -               |         |         |         |
| SDCA_36d   | -               | -             | -            | -               |         |         |         |
| SCM_3h     | -               | -             | -            | -               |         |         |         |
| SCM_P_36d  | -               | -             | -            | -               |         |         |         |
| SCM_36d    | -               | -             | -            | -               |         |         |         |
| SCMA_3h    | -               | -             | -            | -               |         |         |         |
| SCMA_P_36d | -               | -             | -            | -               |         |         |         |
| SCMA_36d   | -               | -             | -            | -               |         |         |         |
| SD_3h      | -               | -             | -            | -               |         |         |         |
| SD_P_36d   | -               | -             | -            | -               |         |         |         |
| SD_36d     | 0.62287         | -             | -            | -               |         |         |         |
| SM_3h      | 0.38914         | 0.49791       | -            | -               |         |         |         |
| SM_P_36d   | 0.49791         | 0.27449       | 0.38914      | -               |         |         |         |
| SM_36d     | 0.40435         | 0.54415       | 0.58316      | 0.09876         |         |         |         |

**Table S6** PERMANOVA performed considering ASV, amendment presence and sampling time.

|                | <b>Df</b> | <b>Sum0fSqs</b> | <b>R2</b> | <b>F</b> | <b>p-value</b> |
|----------------|-----------|-----------------|-----------|----------|----------------|
| Amendment      | 1         | 0.5158          | 0.03227   | 2.9275   | 0.001***       |
| Time           | 1         | 1.6958          | 0.10608   | 9.6242   | 0.001***       |
| Amendment:time | 1         | 0.3825          | 0.02393   | 2.1710   | 0.003**        |
| Residual       | 76        | 13.3917         | 0.83772   |          |                |
| Total          | 79        | 15.9859         | 1.00000   |          |                |

**Table S7** PERMANOVA performed considering ASV and plant presence.

|          | <b>Df</b> | <b>Sum0fSqs</b> | <b>R2</b> | <b>F</b> | <b>p-value</b> |
|----------|-----------|-----------------|-----------|----------|----------------|
| Plant    | 1         | 0.9817          | 0.06141   | 5.1036   | 0.001***       |
| Residual | 78        | 15.0042         | 0.93859   |          |                |
| Total    | 79        | 15.9859         | 1.00000   |          |                |

**Table S8** Main microbial classes found in 3h experimental conditions and their relative abundances

| Experimental conditions at 3h | Class and Relative Abundances (%) |                              |                             |                     |
|-------------------------------|-----------------------------------|------------------------------|-----------------------------|---------------------|
| S                             | Actinobacteria (32.4%)            | Gammaproteobacteria (14.01%) | Alphaproteobacteria (11.5%) | Bacteroidia (6.6%)  |
| SC                            | Actinobacteria (23.9%)            | Gammaproteobacteria (12.9%)  | Bacteroidia (12.2%)         | Bacilli (11.6%)     |
| SCA                           | Actinobacteria (28.8%)            | Gammaproteobacteria (12.9%)  | Bacteroidia (11.3%)         | Anaerolineae (1.5%) |
| SM                            | Actinobacteria (22.1%)            | Gammaproteobacteria (8.9%)   | Alphaproteobacteria (8.8%)  | Bacteroidia (15.8%) |
| SCM                           | Actinobacteria (21.2%)            | Gammaproteobacteria (11.3%)  | Bacteroidia (12.1%)         | Bacilli (13.3%)     |
| SMCA                          | Actinobacteria (17.8%)            | Gammaproteobacteria (10.7%)  | Bacteroidia (19%)           | Bacilli (13.8%)     |
| SD                            | Actinobacteria (24.3%)            | Gammaproteobacteria (13.3%)  | Alphaproteobacteria (11.2%) | Bacteroidia (14.6%) |
| SCD                           | Actinobacteria (25.7%)            | Gammaproteobacteria (14.7%)  | Alphaproteobacteria (13.2%) | Bacteroidia (13.3%) |
| SDCA                          | Actinobacteria (22.1%)            | Gammaproteobacteria (15.2%)  | Alphaproteobacteria (12.8%) | Bacteroidia (15.5%) |

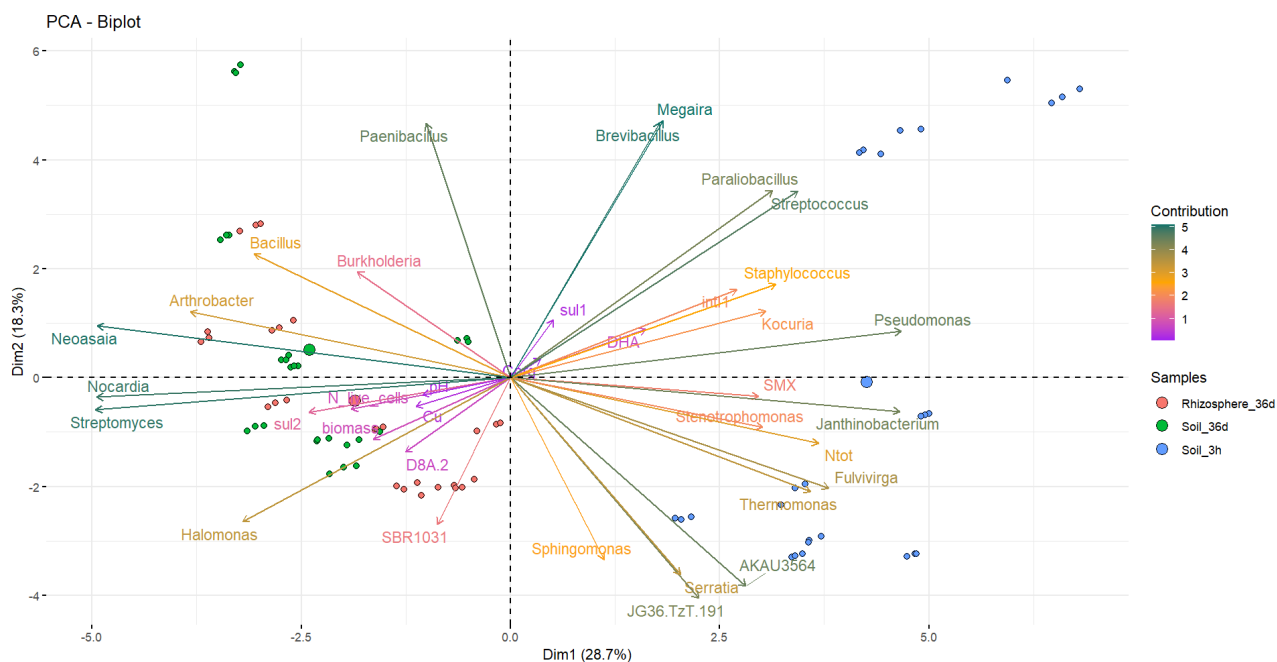

**Figure S1** Principal Component Analysis (PCA) performed on the following variables: antibiotic concentrations (SMX), MGE and ARG relative abundances (intI1, sul1, sul2), Cu concentration (Cu), organic C (%) and total N (%), pH, live cell abundance, DHA, main microbial genera. The blue dots represent samples at 3 hours, the green dots samples of soil at 36 days and red ones, samples of rhizosphere at 36 days. The gradient contribution represents the contribution of the variables to each dimension (from purple: weak to green: strong).

**Table S9** Results of correlations between variables and Dimension 1 of PCA

| Variables                | Dimension 1   |          |
|--------------------------|---------------|----------|
|                          | r correlation | p.value  |
| <i>Pseudomonas</i>       | 0.8554163     | 2.79E-24 |
| <i>Janthinobacterium</i> | 0.8523903     | 5.95E-24 |
| <i>Fulvivirga</i>        | 0.6973664     | 4.73E-13 |
| Ntot                     | 0.6742548     | 5.20E-12 |
| <i>Thermomonas</i>       | 0.6579316     | 2.50E-11 |
| <i>Streptococcus</i>     | 0.6297807     | 3.01E-10 |
| <i>Staphylococcus</i>    | 0.5813749     | 1.26E-08 |
| <i>Paraliobacillus</i>   | 0.5741176     | 2.10E-08 |
| <i>Kocuria</i>           | 0.5586354     | 5.98E-08 |
| <i>Stenotrophomonas</i>  | 0.5521541     | 9.11E-08 |
| SMX                      | 0.5436262     | 1.57E-07 |
| <i>AKAU3564</i>          | 0.515531      | 8.43E-07 |

|                      |            |          |
|----------------------|------------|----------|
| intI1                | 0.4958559  | 2.51E-06 |
| <i>JG36.TzT.191</i>  | 0.4120386  | 1.32E-04 |
| <i>Serratia</i>      | 0.3721833  | 6.23E-04 |
| <i>Megaira</i>       | 0.3349793  | 2.24E-03 |
| <i>Brevibacillus</i> | 0.3268918  | 2.90E-03 |
| DHA                  | 0.29689    | 7.11E-03 |
| <i>D8A.2</i>         | -0.2303121 | 3.86E-02 |
| biomass              | -0.3007699 | 6.37E-03 |
| <i>Burkholderia</i>  | -0.3354633 | 2.20E-03 |
| N_live_cells         | -0.3484853 | 1.43E-03 |
| sul2                 | -0.4412199 | 3.74E-05 |
| <i>Bacillus</i>      | -0.5614525 | 4.96E-08 |
| <i>Halomonas</i>     | -0.5873464 | 8.23E-09 |
| <i>Arthrobacter</i>  | -0.7014673 | 3.02E-13 |
| <i>Neosasaia</i>     | -0.9056367 | 3.63E-31 |
| <i>Nocardia</i>      | -0.906278  | 2.81E-31 |
| <i>Streptomyces</i>  | -0.909008  | 9.22E-32 |

**Table S10** Results of correlations between variables and Dimension 2 of PCA

| Variables              | Dimension 2   |          |
|------------------------|---------------|----------|
|                        | r correlation | p.value  |
| <i>Megaira</i>         | 0.864402      | 2.65E-25 |
| <i>Brevibacillus</i>   | 0.858453      | 1.28E-24 |
| <i>Paenibacillus</i>   | 0.8559058     | 2.47E-24 |
| <i>Paraliobacillus</i> | 0.6302262     | 2.90E-10 |
| <i>Streptococcus</i>   | 0.6276452     | 3.59E-10 |
| <i>Bacillus</i>        | 0.415685      | 1.14E-04 |
| <i>Burkholderia</i>    | 0.3559346     | 1.11E-03 |
| <i>Staphylococcus</i>  | 0.315261      | 4.15E-03 |
| intI1                  | 0.2954277     | 7.42E-03 |
| <i>Kocuria</i>         | 0.2247916     | 4.36E-02 |
| <i>Arthrobacter</i>    | 0.2212381     | 4.72E-02 |
| Ntot                   | -0.2212986    | 4.71E-02 |
| <i>D8A.2</i>           | -0.2509385    | 2.38E-02 |
| <i>Fulvivirga</i>      | -0.3718846    | 6.30E-04 |
| <i>Thermomonas</i>     | -0.3842295    | 3.98E-04 |
| <i>Halomonas</i>       | -0.483962     | 4.71E-06 |
| <i>SBR1031</i>         | -0.4945618    | 2.69E-06 |
| <i>Sphingomonas</i>    | -0.612721     | 1.21E-09 |
| <i>Serratia</i>        | -0.662927     | 1.56E-11 |
| <i>AKAU3564</i>        | -0.7012606    | 3.09E-13 |
| <i>JG36.TzT.191</i>    | -0.7432858    | 1.92E-15 |

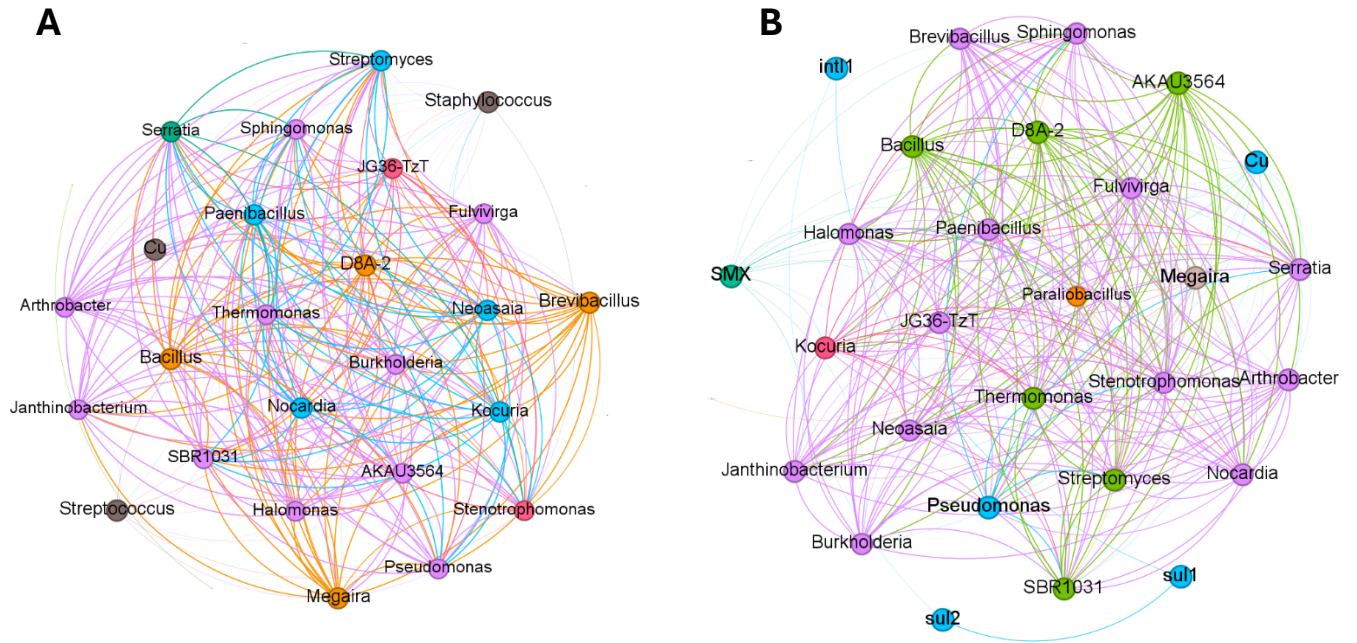

**Figure S2** Network analysis revealing the co-occurrence patterns among ARGs, MGE, AB, Cu and microbial genera analyzed in manure (A: on the left) and digestate (B: on the right) amended conditions at 36 days.

**Table S11** Results of the PostHoc tests (Tukey test) of the ANOVA test considering plant biomass (dry weight) at 36 days and conditions.

|                      | diff         | lwr         | upr         | p adj     |
|----------------------|--------------|-------------|-------------|-----------|
| SC_P_36d-S_P_36d     | -0.191983505 | -0.56571726 | 0.18175025  | 0.7248146 |
| SCA_P_36d-S_P_36d    | -0.259688862 | -0.63342262 | 0.11404489  | 0.3557913 |
| SCD_P_36d-S_P_36d    | 0.402115169  | 0.02838142  | 0.77584892  | 0.0278691 |
| SCM_P_36d-S_P_36d    | -0.116882657 | -0.49061641 | 0.2568511   | 0.9763414 |
| SD_P_36d-S_P_36d     | 0.595939945  | 0.22220619  | 0.9696737   | 0.000341  |
| SDCA_P_36d-S_P_36d   | 0.573947956  | 0.2002142   | 0.94768171  | 0.0005709 |
| SM_P_36d-S_P_36d     | 0.103316873  | -0.27041688 | 0.47705063  | 0.9889839 |
| SMCA_P_36d-S_P_36d   | -0.107945877 | -0.48167963 | 0.26578788  | 0.9854684 |
| SCA_P_36d-SC_P_36d   | -0.067705357 | -0.44143911 | 0.3060284   | 0.9993962 |
| SCD_P_36d-SC_P_36d   | 0.594098674  | 0.22036492  | 0.96783243  | 0.000356  |
| SCM_P_36d-SC_P_36d   | 0.075100847  | -0.29863291 | 0.4488346   | 0.9987291 |
| SD_P_36d-SC_P_36d    | 0.78792345   | 0.4141897   | 1.1616572   | 0.0000041 |
| SDCA_P_36d-SC_P_36d  | 0.76593146   | 0.39219771  | 1.13966521  | 0.0000067 |
| SM_P_36d-SC_P_36d    | 0.295300378  | -0.07843338 | 0.66903413  | 0.2097247 |
| SMCA_P_36d-SC_P_36d  | 0.084037628  | -0.28969613 | 0.45777138  | 0.9972097 |
| SCD_P_36d-SCA_P_36d  | 0.661804031  | 0.28807028  | 1.03553779  | 0.0000731 |
| SCM_P_36d-SCA_P_36d  | 0.142806205  | -0.23092755 | 0.51653996  | 0.927058  |
| SD_P_36d-SCA_P_36d   | 0.855628807  | 0.48189505  | 1.22936256  | 0.0000009 |
| SDCA_P_36d-SCA_P_36d | 0.833636818  | 0.45990306  | 1.20737057  | 0.0000015 |
| SM_P_36d-SCA_P_36d   | 0.363005735  | -0.01072802 | 0.73673949  | 0.0618918 |
| SMCA_P_36d-SCA_P_36d | 0.151742985  | -0.22199077 | 0.52547674  | 0.900748  |
| SCM_P_36d-SCD_P_36d  | -0.518997827 | -0.89273158 | -0.14526407 | 0.0020544 |
| SD_P_36d-SCD_P_36d   | 0.193824776  | -0.17990898 | 0.56755853  | 0.7150001 |
| SDCA_P_36d-SCD_P_36d | 0.171832786  | -0.20190097 | 0.54556654  | 0.8235517 |
| SM_P_36d-SCD_P_36d   | -0.298798296 | -0.67253205 | 0.07493546  | 0.1981625 |
| SMCA_P_36d-SCD_P_36d | -0.510061046 | -0.8837948  | -0.13632729 | 0.0025256 |
| SD_P_36d-SCM_P_36d   | 0.712822603  | 0.33908885  | 1.08655636  | 0.0000224 |
| SDCA_P_36d-SCM_P_36d | 0.690830613  | 0.31709686  | 1.06456437  | 0.0000372 |
| SM_P_36d-SCM_P_36d   | 0.220199531  | -0.15353422 | 0.59393328  | 0.5672895 |
| SMCA_P_36d-SCM_P_36d | 0.008936781  | -0.36479697 | 0.38267053  | 1         |
| SDCA_P_36d-SD_P_36d  | -0.02199199  | -0.39572574 | 0.35174176  | 0.9999999 |

|                       |              |             |             |           |
|-----------------------|--------------|-------------|-------------|-----------|
| SM_P_36d-SD_P_36d     | -0.492623072 | -0.86635683 | -0.11888932 | 0.00377   |
| SMCA_P_36d-SD_P_36d   | -0.703885822 | -1.07761958 | -0.33015207 | 0.0000275 |
| SM_P_36d-SDCA_P_36d   | -0.470631082 | -0.84436484 | -0.09689733 | 0.0062156 |
| SMCA_P_36d-SDCA_P_36d | -0.681893832 | -1.05562759 | -0.30816008 | 0.0000458 |
| SMCA_P_36d-SM_P_36d   | -0.21126275  | -0.5849965  | 0.162471    | 0.6181861 |
| SCM_P_36d-SCD_P_36d   | -0.518997827 | -0.89273158 | -0.14526407 | 0.0020544 |
| SD_P_36d-SCD_P_36d    | 0.193824776  | -0.17990898 | 0.56755853  | 0.7150001 |
| SDCA_P_36d-SCD_P_36d  | 0.171832786  | -0.20190097 | 0.54556654  | 0.8235517 |
| SM_P_36d-SCD_P_36d    | -0.298798296 | -0.67253205 | 0.07493546  | 0.1981625 |
| SMCA_P_36d-SCD_P_36d  | -0.510061046 | -0.8837948  | -0.13632729 | 0.0025256 |
| SD_P_36d-SCM_P_36d    | 0.712822603  | 0.33908885  | 1.08655636  | 0.0000224 |
| SDCA_P_36d-SCM_P_36d  | 0.690830613  | 0.31709686  | 1.06456437  | 0.0000372 |
| SM_P_36d-SCM_P_36d    | 0.220199531  | -0.15353422 | 0.59393328  | 0.5672895 |
| SMCA_P_36d-SCM_P_36d  | 0.008936781  | -0.36479697 | 0.38267053  | 1         |
| SDCA_P_36d-SD_P_36d   | -0.02199199  | -0.39572574 | 0.35174176  | 0.9999999 |
| SM_P_36d-SD_P_36d     | -0.492623072 | -0.86635683 | -0.11888932 | 0.00377   |
| SMCA_P_36d-SD_P_36d   | -0.703885822 | -1.07761958 | -0.33015207 | 0.0000275 |
| SM_P_36d-SDCA_P_36d   | -0.470631082 | -0.84436484 | -0.09689733 | 0.0062156 |
| SMCA_P_36d-SDCA_P_36d | -0.681893832 | -1.05562759 | -0.30816008 | 0.0000458 |
| SMCA_P_36d-SM_P_36d   | -0.21126275  | -0.5849965  | 0.162471    | 0.6181861 |
